# 1 **The minimum land area requiring conservation attention to** 2 **safeguard biodiversity**

3

4 **Abbreviated Title:** Land area needed to conserve biodiversity

## 5 **Authors**

6 James R. Allan<sup>\*1,2</sup>, Hugh P. Possingham<sup>2,3</sup>, Scott C. Atkinson<sup>2,4</sup>, Anthony Waldron<sup>5</sup>,  
7 Moreno Di Marco<sup>6,7</sup>, Vanessa M. Adams<sup>8</sup>, Stuart H. M. Butchart<sup>9,10</sup>, W. Daniel  
8 Kissling<sup>1</sup>, Thomas Worsdell<sup>11</sup>, Gwili Gibbon<sup>12</sup>, Kundan Kumar<sup>11</sup>, Piyush Mehta<sup>13</sup>,  
9 Martine Maron<sup>2,7</sup>, Brooke A. Williams<sup>2,7</sup>, Kendall R. Jones<sup>14</sup>, Brendan A. Wintle<sup>15</sup>,  
10 April E. Reside<sup>2,7</sup>, James E.M. Watson<sup>2,7</sup>

## 11 **Affiliations**

12 <sup>1</sup>Institute for Biodiversity and Ecosystem Dynamics (IBED), University of Amsterdam, P.O. Box 94240,  
13 1090 GE, Amsterdam, The Netherlands

14 <sup>2</sup>Centre for Biodiversity and Conservation Science, The University of Queensland, St Lucia, QLD  
15 4072, Australia

16 <sup>3</sup>The Nature Conservancy, VA 22203-1606, USA

17 <sup>4</sup>United Nations Development Programme (UNDP), New York, New York, USA

18 <sup>5</sup>Cambridge Conservation Initiative, David Attenborough Building, Department of Zoology, Cambridge  
19 University, Cambridge CB2 3QZ, UK

20 <sup>6</sup>Department of Biology and Biotechnologies, Sapienza University of Rome, viale dell'Università 32, I-  
21 00185 Rome, Italy

22 <sup>7</sup>School of Earth and Environmental Sciences, The University of Queensland, St Lucia QLD 4072,  
23 Australia

24 <sup>8</sup>School of Technology, Environments & Design, University of Tasmania, Hobart, TAS 7001, Australia

25 <sup>9</sup>BirdLife International, David Attenborough Building, Pembroke Street, Cambridge CB2 3QZ, UK

26 <sup>10</sup>Department of Zoology, University of Cambridge, Downing Street, Cambridge CB2 3EJ, UK

27 <sup>11</sup>Rights and Resources Initiative, Washington, D. C., USA

28 <sup>12</sup>Durrell Institute of Conservation and Ecology, School of Anthropology and Conservation, University  
29 of Kent, Canterbury, CT2 7NR, UK

30 <sup>13</sup>University of Delaware, Newark, DE 19716, USA

31 <sup>14</sup>Wildlife Conservation Society, Global Conservation Program, 2300 Southern Boulevard, Bronx, NY  
32 10460-1068, USA

33 <sup>15</sup>School of BioSciences, University of Melbourne, Vic., Australia

34

35 **Keywords** Protected Areas, Conservation Planning, Restoration, Global  
36 Conservation Priorities, Strategic Plan for Biodiversity, Convention on Biological  
37 Diversity, Conservation Priorities, Key Biodiversity Areas, Wilderness, Ecologically  
38 Intact.

39 \*Correspondence to: James R. Allan. E-mail: [James.allan@uqconnect.edu.au](mailto:James.allan@uqconnect.edu.au)

40 **More ambitious conservation efforts are needed to stop the global biodiversity**  
41 **crisis. Here, we estimate the minimum land area to secure important sites for**  
42 **terrestrial fauna, ecologically intact areas, and the optimal locations for**  
43 **representation of species ranges and ecoregions. We discover that at least 64**  
44 **million km<sup>2</sup> (44% of terrestrial area) requires conservation attention. Over 1.8**  
45 **billion people live on these lands so responses that promote agency, self-**  
46 **determination, equity, and sustainable management for safeguarding**  
47 **biodiversity are essential. Spatially explicit land-use scenarios suggest that 1.3**  
48 **million km<sup>2</sup> of land requiring conservation could be lost to intensive human**  
49 **land-uses by 2030, which requires immediate attention. However, there is a**  
50 **seven-fold difference between the amount of habitat converted under**  
51 **optimistic and pessimistic scenarios, highlighting an opportunity to avert this**  
52 **crisis. Appropriate targets in the post-2020 Global Biodiversity Framework to**  
53 **ensure conservation of the identified land would contribute substantially to**  
54 **safeguarding biodiversity.**

55 Securing places with high conservation value is crucial for safeguarding biodiversity<sup>1</sup>  
56 and is central to the Convention on Biological Diversity (CBD)'s 2050 vision of  
57 sustaining a healthy planet and delivering benefits for all people<sup>2</sup>. CBD Aichi Target  
58 11 aimed to conserve at least 17% of land area by 2020<sup>3</sup>, but this is widely seen as  
59 inadequate for halting biodiversity declines and averting the crisis<sup>4</sup>. Post-2020 target  
60 discussions are now well underway<sup>5</sup>, and there is a broad consensus that the  
61 amount of land and sea managed for biodiversity conservation must increase<sup>6</sup>.  
62 Recent calls are for targets to conserve anywhere from 26 to 60% of land and ocean  
63 area by 2030 through site-scale responses such as protected areas and 'other  
64 effective area-based conservation measures' (OECMs)<sup>7-12</sup>. There is also increasing  
65 recognition that site-scale responses must be supplemented by broader landscape-  
66 scale actions aimed at addressing habitat degradation and loss<sup>13</sup>. While global  
67 conservation targets are set by political intergovernmental negotiation, scientific input  
68 is necessary to identify the location and amount of land requiring conservation  
69 attention, and to inform potential strategies.

70 Several scientific approaches exist that help provide evidence to inform global  
71 conservation efforts, but when used in isolation, they can provide conflicting advice.  
72 In particular, there are efficiency-based planning approaches that focus on  
73 maximising the number of species or ecosystems captured within a complementary  
74 set of conservation areas, weighting species and ecosystems by their endemism,  
75 extinction risk, or other criteria<sup>14,15</sup>. There are also threshold-based approaches such  
76 as the Key Biodiversity Area (KBA) initiative<sup>16</sup>, which identifies sites of significance  
77 for the global persistence of biodiversity using criteria relating to the occurrence of  
78 threatened or geographically restricted species or ecosystems, intact ecological  
79 communities, or important biological processes (e.g. breeding aggregations)<sup>16</sup>. There  
80 are also proactive approaches that aim to conserve the most ecologically intact  
81 places before they are degraded<sup>17</sup>. These intact areas are increasingly recognised  
82 as essential for sustaining long-term ecological and evolutionary processes<sup>18</sup>, and  
83 long-term species persistence<sup>19</sup>, especially under climate change<sup>20</sup>. Examples  
84 include boreal forests which support many wide-ranging species<sup>21,22</sup>, and the  
85 Amazon rainforest which needs to be maintained in its entirety, not just for its most  
86 species-rich areas but also to sustain continent-scale hydrological patterns that  
87 underpin its ecosystems<sup>23</sup>.

88           Although these approaches are complementary and provide essential  
89 evidence to set and meet biodiversity conservation targets, the adoption of any one  
90 of them as a unique guide for decision-making is likely to omit potentially critical  
91 elements of the CBD vision<sup>24</sup>. For example, a species-based focus on identifying  
92 areas in a way that most efficiently captures the most species would fail to recognise  
93 the critical need to maintain large intact ecosystems globally for biodiversity  
94 persistence<sup>19</sup>. Equally, a focus on proactively conserving ecologically intact  
95 ecosystems would fail to achieve adequate conservation of some threatened species  
96 or ecosystems<sup>25</sup>. Put simply, all approaches will lead to partly overlapping but often  
97 distinct science-based suggestions for area-based conservation<sup>26</sup>. We suggest that  
98 combining these approaches into a unified global framework that seeks to  
99 comprehensively conserve species, ecosystems, and the remaining intact  
100 ecosystems offers a better scientific basis for achieving the CBD vision.

101           Here, we identify the minimum land area requiring conservation attention  
102 globally. We start from the basis of existing protected areas<sup>27</sup>, KBAs<sup>28</sup>, and  
103 ecologically intact areas<sup>29</sup>, and then efficiently add a fraction of the ranges of 35,561  
104 species of mammals, birds, amphibians, reptiles, freshwater crabs, shrimp, and  
105 crayfish scaled to the sizes of their ranges<sup>14,15,30</sup>, while also capturing samples (17%  
106 of area, following CBD Aichi Target 11) of all terrestrial ecoregions<sup>31</sup>. We used these  
107 taxonomic groups because they are those most comprehensively assessed and  
108 mapped by the International Union for the Conservation of Nature (IUCN), noting that  
109 the inclusion of plants and other groups would likely increase the area identified  
110 above our minimum.

111           We do not suggest the land we map should be designated as protected areas  
112 that preclude other land management strategies. Rather, we argue that it should be  
113 managed through a range of strategies for species and ecosystem conservation. We  
114 define the term ‘conservation attention’ to capture this broad range of strategies  
115 which lead to positive biodiversity outcomes. For example, extensive areas that are  
116 remote and unlikely to be converted for human uses in the near-term could be  
117 safeguarded through effective sustainable land-use policies, while other areas could  
118 be conserved through self-determined local governance regimes led by Indigenous  
119 Peoples and Local Communities. We believe the appropriate governance and  
120 management regimes for any area depends in part on the likelihood of its habitat

121 being converted or degraded by intensive human uses<sup>32-34</sup> as well as the land tenure  
122 regimes and other socio-political factors and as such, the response for conserving  
123 the areas we identify will be context specific.

124 To highlight places that need the most immediate attention, we further  
125 calculate which parts of the land needing conservation are most likely to suffer  
126 habitat conversion in the near future. We do this by using harmonised projections of  
127 future land-use change by 2030 and 2050<sup>35</sup>. To determine best- to worst-case  
128 scenarios, we evaluated projections under three different shared socioeconomic  
129 pathways (SSPs)<sup>36</sup> linked to representative concentration pathways (RCPs)<sup>37</sup>: an  
130 optimistic scenario where the world gradually moves towards a more sustainable  
131 future, SSP1 (RCP2.6; IMAGE model), a middle-of-the-road scenario without any  
132 extreme changes towards or away from sustainability (SSP2; MESSAGE-GLOBIOM  
133 model), and a pessimistic scenario where regional rivalries dominate international  
134 relations and land-use change is poorly regulated, SSP3 (RCP7.0; AIM model).  
135 Given uncertainty in which pathway humanity is following we also created an  
136 “ensemble” land-use projection where we calculated the average loss across all  
137 three SSPs.

138 We also estimate and map the number of people living on the land area  
139 requiring conservation attention, including within current protected areas, using the  
140 LandScan 2018 global distribution<sup>38</sup>. We performed this calculation in view of the  
141 potential impact of conservation on people living in such areas given the history of  
142 human rights abuses<sup>39</sup>, displacement<sup>40</sup>, and militarised forms of violence<sup>41</sup>  
143 associated with some actions done in the name of conservation<sup>42</sup>. These rights-  
144 abuses are linked to a pervasive lack of tenure-rights recognition and culturally  
145 appropriate rights frameworks for conservation<sup>43-45</sup>. Communities already effectively  
146 conserve large tracts of land, and supporting their actions will thus be a key strategy  
147 to continue safeguarding biodiversity<sup>46</sup>.

#### 148 **The minimum land area requiring conservation attention**

149 We estimate that, in total, the minimum land area requiring conservation attention is  
150 64.7 million km<sup>2</sup> (44% of Earth's terrestrial area; Figure 1). This consists of 35.1  
151 million km<sup>2</sup> of ecologically intact areas, 20.5 million km<sup>2</sup> of existing protected areas,  
152 11.6 million km<sup>2</sup> of KBAs, and 12.4 million km<sup>2</sup> (8.4% of terrestrial area) of additional

153 land (i.e. outside protected areas, KBAs and ecologically intact areas) needed to  
154 promote species persistence based on conserving minimum proportions of their  
155 ranges (Figure 2). Moreover, protected areas, KBAs and ecologically intact areas  
156 only have a three way overlap on 1.8 million km<sup>2</sup>, and consensus area (overlap) only  
157 captures 5% of ecologically intact areas, 9% of protected area extent, and 16% of  
158 KBA extent, emphasising the importance of considering the various approaches in a  
159 unified framework as we do here.

160         There is considerable geographic variation in the amount of land requiring  
161 conservation. We find that at least 64% of land in North America needs to be  
162 conserved, primarily due to the ecologically intact areas of Canada and the USA and  
163 extensive additional land areas in Central America. In contrast, at least 33.1% of  
164 Europe's land area requires conservation. The proportion of land requiring  
165 conservation also varies considerably among nations (Figure 3), with notably high  
166 values in Canada (84%) largely due to its extensive ecologically intact areas, Costa  
167 Rica (86%), Suriname (84%), and Ecuador (81%), due to their high numbers of  
168 endemic species and, in Ecuador's case, the inclusion of a large overlap with the  
169 remaining Amazon forest (Extended Data Table 1). We also find that a larger  
170 percentage of land in developed economies (55% in total) requires effective  
171 conservation compared to emerging economies (48%) or developing economies  
172 (30%)                   (Extended                   Data                   Table                   2).

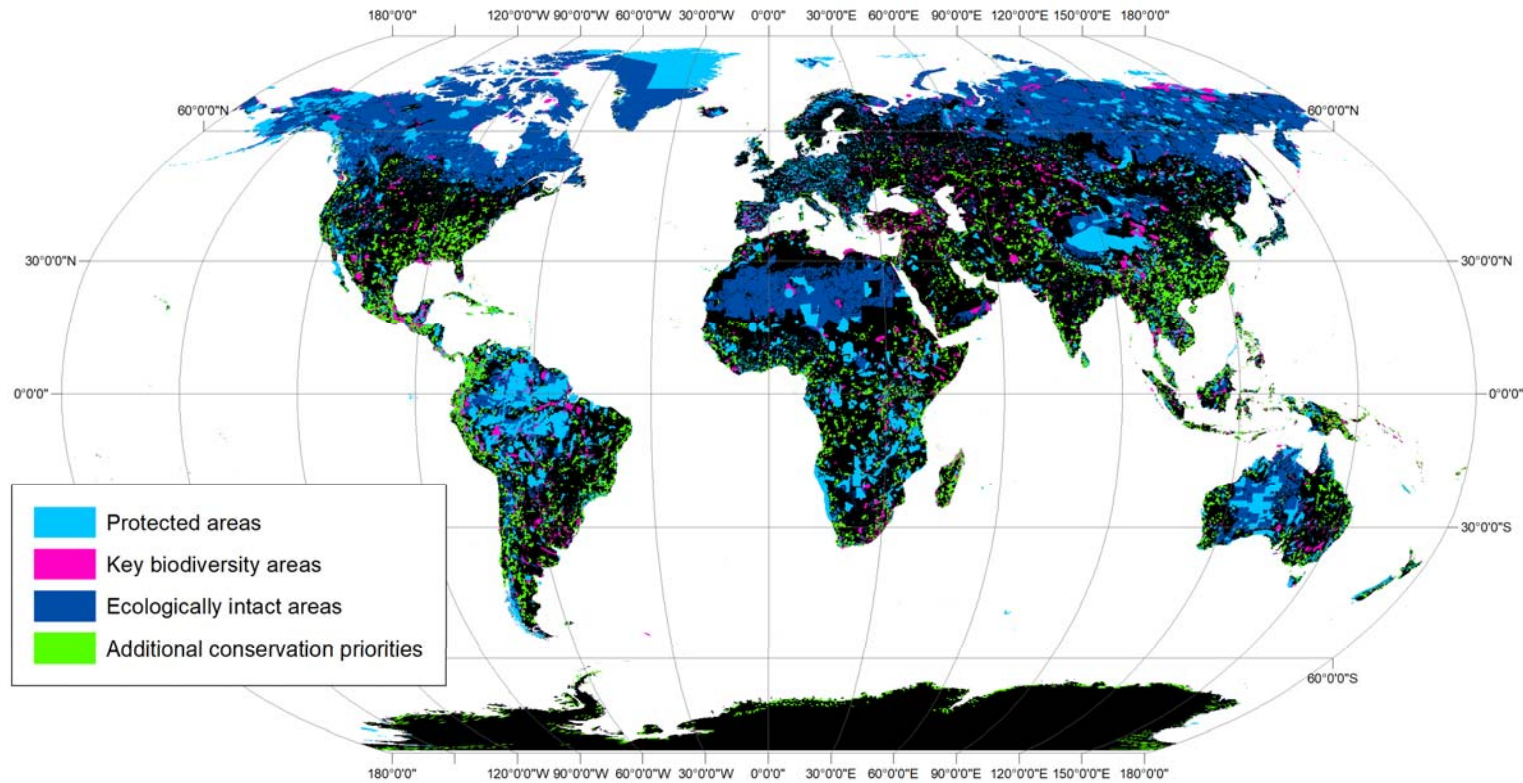

174

175 **Figure 1. The minimum land area for conserving terrestrial biodiversity.** The components include protected areas (light blue),  
 176 Key Biodiversity Areas (purple) and ecologically intact areas (dark blue). Where they overlap, protected areas are shown above  
 177 Key Biodiversity Areas, which are shown above ecologically intact areas. New conservation priorities are in green. The Venn  
 178 diagram shows the proportional overlap between features.



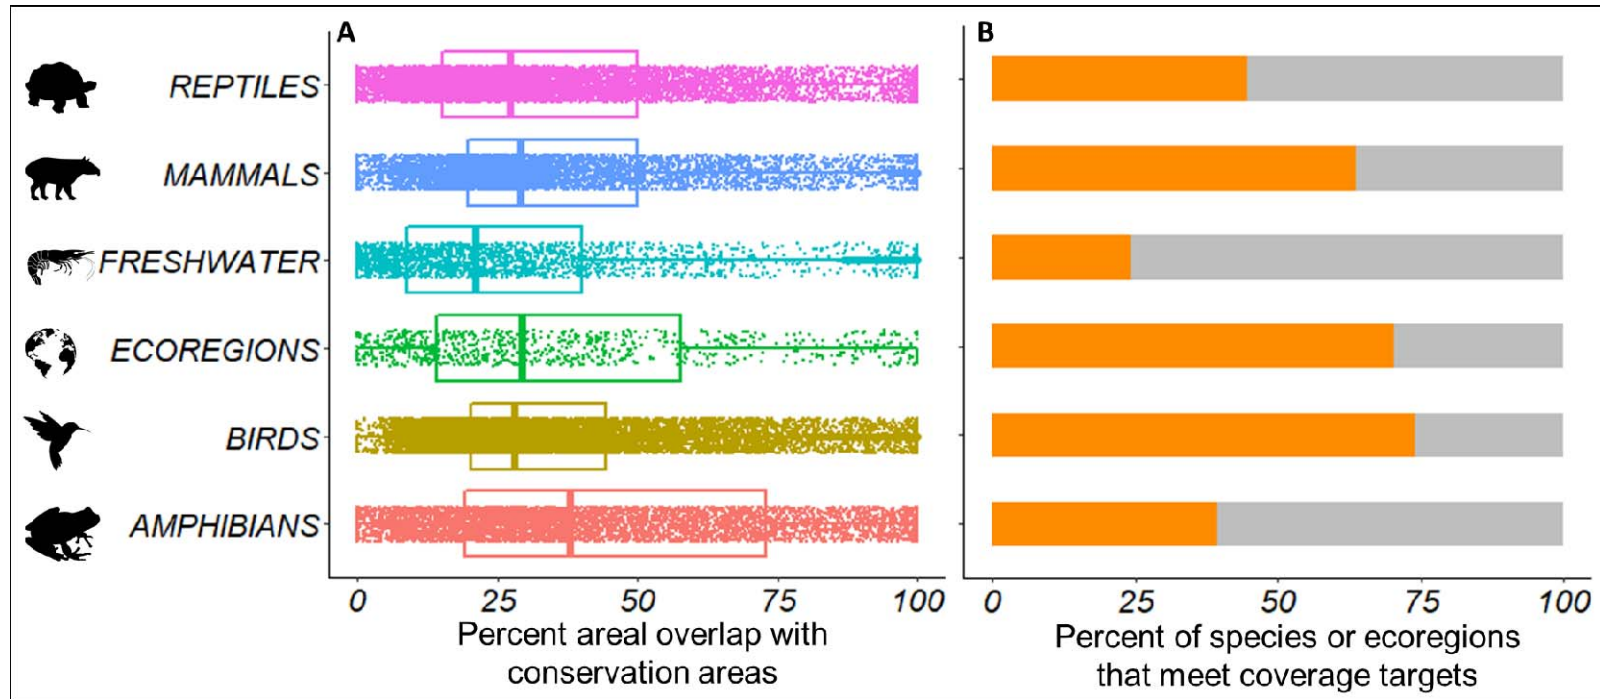

180

181 **Figure 2. Gap analyses of species and ecoregion coverage within areas of conservation importance.** A) The percentage of  
 182 the distribution of each species (in different taxonomic groups; freshwater includes crabs, shrimp and crayfish) and ecoregion area  
 183 that overlaps with areas of conservation importance (protected areas, Key Biodiversity Areas, and ecologically intact areas).  
 184 Boxplots show the median and 25<sup>th</sup> and 75<sup>th</sup> percentiles for each taxonomic group. B) The percentage of species and ecoregions  
 185 with an adequate proportion of their distribution overlapping existing conservation areas to meet specific coverage targets for  
 186 species (10–100% depending on range size) or ecoregions (17%) (orange).

## 187 **Future risk of land conversion in areas requiring conservation attention**

188 We found that 44.9 million km<sup>2</sup> (70.1%) of the land area requiring conservation  
189 attention is currently intact, implying a significant restoration requirement. Our results  
190 further suggest that under the pessimistic scenario SSP3, 1.3 million km<sup>2</sup> (2.8%) of  
191 the total intact land area requiring conservation will undergo habitat conversion to  
192 intensive human land-uses by 2030, increasing to 2.2 million km<sup>2</sup> (4.9%) by 2050.  
193 Projected habitat conversion varies across continents and countries (Figure 4).  
194 Africa is projected to have the highest proportion of intact conservation land  
195 converted by 2030 (>800,506 km<sup>2</sup>, 9% of Africa's intact habitat), increasing to 1.4  
196 million km<sup>2</sup> (15.9%) by 2050 (Extended Data Tables 3-4). The lowest risk of  
197 conversion is in Oceania and North America. Substantially larger proportions of  
198 intact land requiring conservation in developing economies are projected to have  
199 their habitat converted by 2030 (7.1%), compared with emerging economies (1.7%)  
200 or developed economies (1.1%). By 2050, developing economies are projected to  
201 have 12.7% of their intact habitat requiring conservation converted under SSP3  
202 (Extended Data Table 5), notably a lot of this loss is driven by demand in developed  
203 economies<sup>47</sup>. KBA's are projected to have the largest proportion of habitat converted  
204 compared with protected areas and ecologically intact areas (Extended Data Table  
205 6).

206 Based on SSP1, representing a world acting sustainably, we estimate that  
207 136,380 km<sup>2</sup> (0.3%) of the intact land requiring effective conservation may suffer  
208 natural habitat conversion by 2030, increasing to 320,558 km<sup>2</sup> (0.7%) by 2050.  
209 Based on SSP2, representing a middle-of-the-road scenario, the values become  
210 841,438 km<sup>2</sup> (1.9%) by 2030 and 1.5 million km<sup>2</sup> (3.3%) by 2050. This highlights how  
211 our results are sensitive to future societal development pathways, but even under the  
212 most optimistic scenario (SSP1), large extents of important conservation land are at  
213 risk of having natural habitat converted to more intensive human land-uses.  
214 However, the seven-fold difference between the amount of habitat converted under  
215 SSP1 vs. SSP3 shows there is a large window of opportunity for humanity to avert  
216 the biodiversity crisis.

217 There is inherent uncertainty in future land-use projections and on which SSP  
218 society is tracking most closely. To minimise the effect of this uncertainty, we also  
219 calculated the average intact habitat loss across the three SSP scenarios. In this

220 'ensemble' scenario, we expect 740,599 km<sup>2</sup> (1.7%) of intact habitat in land requiring  
221 conservation to be converted by 2030, increasing to 1.3 million km<sup>2</sup> by 2050 (2.9%).

222

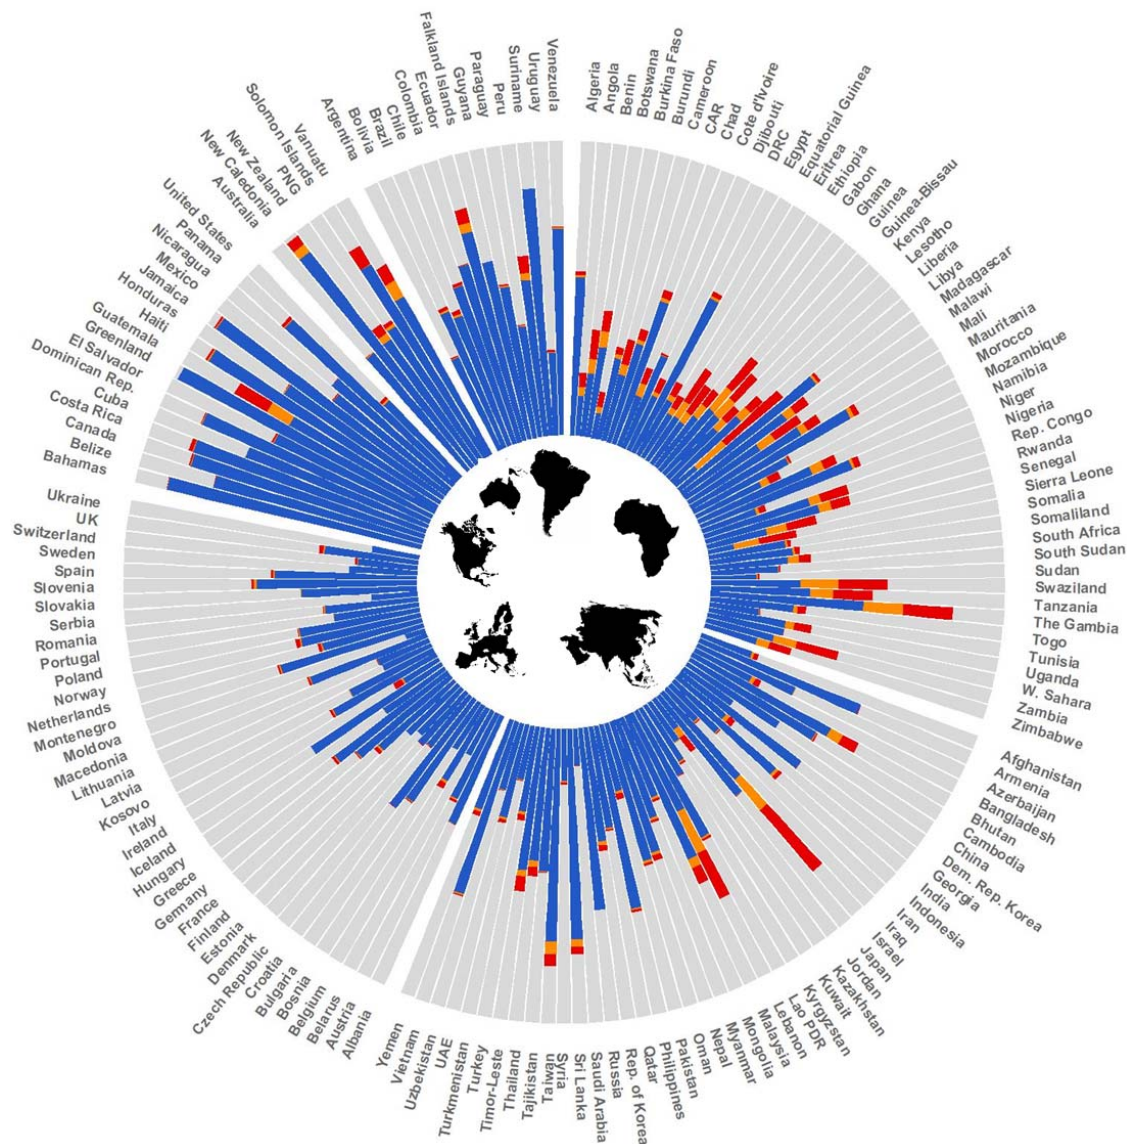

223

224 **Figure 3. National level land area for conservation and projected habitat loss.**

225 Estimated proportion of each country requiring effective conservation attention that is  
 226 projected to suffer habitat conversion by 2030 (orange) and 2050 (red) or that are  
 227 projected not to be converted (blue) according to Shared Socioeconomic Pathway 3  
 228 (SSP3; a worst-case scenario). Grey areas are outside the land identified for  
 229 conservation. We excluded 85 countries with a land area < 10,000 km<sup>2</sup> from the  
 230 figure.

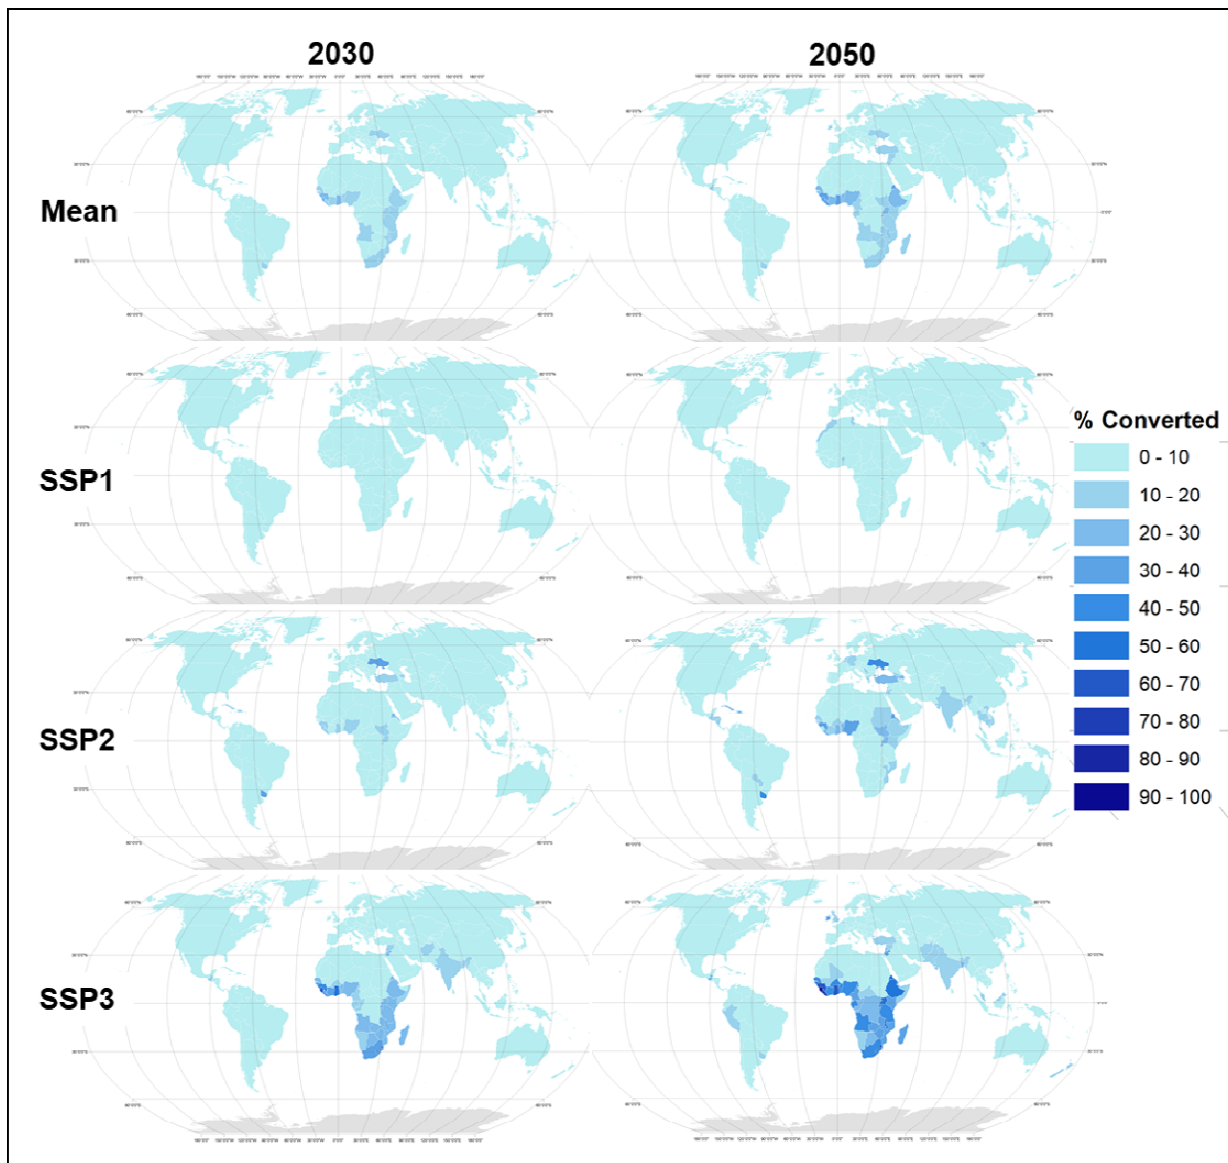

232 **Figure 4. Future habitat conversion on land requiring conservation attention.**

233 The proportion of natural habitat on land requiring conservation that is projected to  
234 be converted to human uses by 2030 and 2050 based on Shared Socioeconomic  
235 Pathway 1 (SSP1; an optimistic scenario), Shared Socioeconomic Pathway 2 (SSP2;  
236 a middle-of-the-road scenario), Shared Socioeconomic Pathway 3 (SSP3; a  
237 pessimistic scenario), and the mean loss across the three scenarios (Mean). The  
238 data on future land use does not extend to Antarctica.

239 **Human population in areas requiring conservation**

240 We found that 1.87 billion people live in the land area requiring conservation  
241 attention, which is approximately one-quarter of Earth's human population (24%)  
242 (Extended Data Figure 1). Africa, Asia and Central America have particularly large  
243 proportions of their human populations living on important conservation land  
244 (Extended Data Figure 2). The majority of people living in the area requiring  
245 conservation are in emerging and developing economies, which also have much  
246 higher proportions of their populations (often above 20%) living in areas requiring  
247 conservation compared to developed economies (Figure 5). This raises social justice  
248 questions regarding scaling up conservation strategies to meet biodiversity goals.

249

250

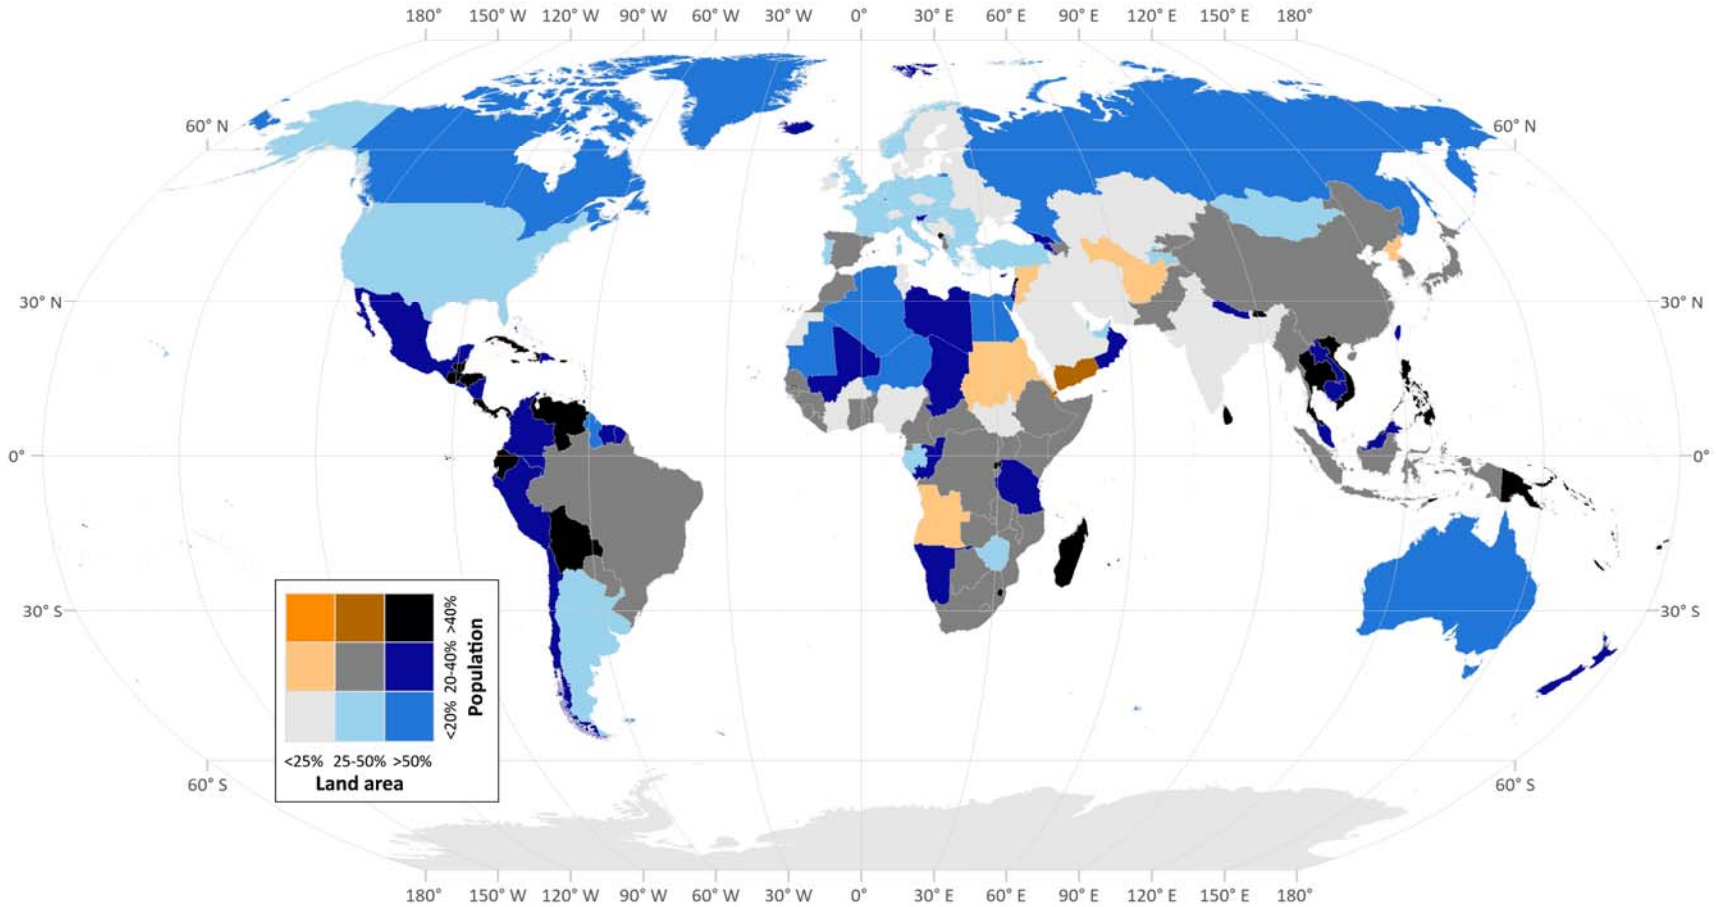

251

252 **Figure 5.** Bivariate map showing the proportion of each country's human population living in areas requiring conservation attention,  
253 and the proportion of each country's land area requiring conservation attention.

## 254 **Implications for global policy**

255 Our analyses represent a comprehensive scientific estimate of the minimum land  
256 area requiring conservation attention to safeguard biodiversity. Given our inclusion of  
257 ecologically intact areas, updated maps of KBAs, and additional locations to  
258 conserve species, our estimate that 44% of land requires conservation attention is,  
259 unsurprisingly, larger than those from previous analyses that have focussed primarily  
260 on species and/or ecosystems, used earlier KBA datasets and/or didn't include  
261 ecologically intact areas (e.g. 27.9% Butchart, et al. <sup>15</sup>, 20.2% Venter, et al. <sup>14</sup>, and  
262 30% Larsen, et al. <sup>4</sup>). Conservation attention to the areas we identify will be  
263 important for achieving a suite of targets in the post-2020 Global Biodiversity  
264 Framework under the Convention for Biological Diversity. These include increasing  
265 the area, connectivity and integrity of natural ecosystems, and supporting healthy  
266 and resilient populations of all species while reducing the number of species that are  
267 threatened and maintaining genetic diversity (the focus of draft Goal A); retaining  
268 ecologically intact areas (draft Target 1); conserving areas of particular importance  
269 for biodiversity (draft Target 2); and enabling recovery and conservation of wild  
270 species of fauna and flora (draft Target 3)<sup>48</sup>.

271 The figure of 44% of Earth's land requiring conservation attention is large;  
272 however, 70% of this area is still relatively intact, implying these places may not  
273 need the larger investments required to restore landscapes<sup>49</sup>. In contrast, 1.3 million  
274 km<sup>2</sup> of land needing conservation, mostly in developing and emerging economies, is  
275 at risk of habitat conversion to intensive human land-uses and consequent  
276 biodiversity loss so is an immediate conservation priority. Appropriately worded  
277 targets in the post-2020 Global Biodiversity Framework to safeguard these at-risk  
278 places would make a significant contribution towards addressing the biodiversity  
279 crisis, as long as it is accompanied with parallel efforts ensuring that habitat  
280 conversion is not displaced into other important conservation areas<sup>50</sup>.

281 Our finding that 1.8 billion people live in areas requiring conservation attention  
282 raises important questions about implementation. Historically, some conservation  
283 actions have adversely affected and continue to negatively affect Indigenous  
284 Peoples, Afro-descendants, and local communities<sup>39-41</sup>. The high number of people  
285 living in areas requiring conservation attention implies that practices such as



286 displacing or relocating people will not only be unjust, but also not possible.  
287 Evidence shows that in many cases Indigenous Peoples and local communities have  
288 been effective stewards of biodiversity worldwide<sup>51</sup>. An ethical strategy that may  
289 effectively safeguard large extents of land is a rights-based approach to  
290 conservation<sup>45,52</sup>. The central pillars of this are i) recognising that through their  
291 customary practices Indigenous Peoples, Afro-descendants, and local communities  
292 have already demonstrated both leadership and agency in biodiversity conservation  
293 across the world<sup>53</sup>; ii) recognising their rights to land, benefit sharing, and institutions,  
294 and supporting efforts to strengthen these rights, so they can continue to effectively  
295 conserve their own lands; and iii) making Indigenous Peoples, Afro-descendants,  
296 and local communities partners in setting the global conservation agendas through  
297 the CBD and promoted as leaders in achieving its targets. Large areas requiring  
298 conservation attention are claimed by Indigenous Peoples, Afro-descendants, and  
299 local communities as their territories or lands so supporting them to continue  
300 conserving these places may be the most effective and efficient way to meet many  
301 biodiversity targets, while governments may need to work with them to ensure these  
302 lands are not converted to other less biodiversity friendly land-uses.

303 A number of additional actions are required to achieve the scale of  
304 conservation necessary to deliver positive biodiversity outcomes. On all land  
305 requiring conservation attention the expansion of roads and developments such as  
306 agriculture, forestry, and mining, needs to follow development frameworks such as  
307 the mitigation hierarchy to ensure 'no net loss' of biodiversity and natural  
308 ecosystems<sup>54</sup>. As such, mechanisms that direct developments away from important  
309 conservation areas are also crucial, including strengthening investment and  
310 performance standards for financial organisations such as the World Bank and other  
311 development investors<sup>55</sup>, and tightening existing industry certification standards. Our  
312 threat analysis only looked at future land conversion; however, a range of other  
313 threats such as overhunting, climate change, and fragmentation must also be  
314 considered and mitigated in areas requiring conservation attention.

315 A critical implementation challenge is that the proportion of land that different  
316 countries would need to conserve is highly inequitable. This variation is largely a  
317 reflection of the distribution of biodiversity, where tropical countries with high species  
318 richness and many restricted range endemics require large areas of land to be

319 conserved because there are few other places to conserve those species. The  
320 variation is also due to the distribution of ecologically intact areas, whereby five  
321 countries, Canada, Russia, USA, Brazil and Australia contain 75% of Earth's  
322 ecologically intact areas<sup>17</sup>, and so will each need to conserve large areas. In  
323 responding to this inequity, the conservation community can apply the concept of  
324 common but differentiated responsibilities that is foundational to all global  
325 environmental agendas including the CBD<sup>56</sup> and United Nations Framework  
326 Convention on Climate Change<sup>57</sup>. Since the burden of conservation is  
327 disproportionately distributed, cost-sharing and fiscal transfer mechanisms are likely  
328 necessary to ensure that all national participation is equitable and fair, and the  
329 opportunity costs of foregone developments are considered<sup>58,59</sup>. This is important  
330 since the majority of land requiring conservation attention that is at risk of immediate  
331 habitat conversion is found in developing economies. Notably, many environmental  
332 impacts in emerging and developing economies are driven by consumption in  
333 developed economies<sup>47</sup>, who have a moral obligation to reduce these demands or  
334 fund the necessary local conservation efforts.

335 Our estimate of the land area requiring effective biodiversity conservation  
336 must be considered the bare minimum needed, and will almost certainly expand as  
337 more data on the distributions of underrepresented species such as plants,  
338 invertebrates, and freshwater species becomes available for future analyses<sup>60</sup>. New  
339 KBAs are continuing to be identified for under-represented taxonomic groups,  
340 threatened or geographically-restricted ecosystems, and highly intact and  
341 irreplaceable ecosystems. Species and ecosystems are also shifting under climate  
342 change, and as a result, are leading to changes in the location of land requiring  
343 effective conservation<sup>61</sup>, which we could not account for. Future analyses could use  
344 our framework to identify the efficacy of the areas we identified in conserving shifting  
345 species ranges under climate change. We also note that post-2020 biodiversity  
346 targets may imply higher levels of ecoregional representation than the 17% we used  
347 (see Methods). Many of the species representation targets ( $n = 5182$ , 14.6%) could  
348 not be met within existing habitat, emphasising the importance of restoration over the  
349 coming decades. Given the prioritisation approach used, every loss of a place that  
350 was identified makes the total area requiring conservation attention grow, since to

351 meet species and ecoregion coverage targets, the algorithm will be forced to find a  
352 less-optimal configuration of land areas.

353 For the above reasons, our results do not imply that the land our analysis did  
354 not identify, (i.e. the other 56% of Earth's land surface), is unimportant for  
355 conservation and global sustainable development goals. Much of this area will be  
356 important for sustaining the provision of ecosystem services to people, from climate  
357 regulation to provisioning of food, materials, drinking water, and crop pollination, in  
358 addition to supporting other elements of biodiversity not captured in our priority  
359 areas<sup>6</sup>. Furthermore, many human activities can impact the entire Earth system  
360 regardless of where they occur (e.g. fossil fuel use, pesticide use, and pollution), so  
361 management efforts focussed on limiting the ultimate drivers of biodiversity loss are  
362 essential<sup>62</sup>. Finally, we have not considered how constraining developments to  
363 locations outside of the land area needing conservation impacts solutions for  
364 meeting human needs, such as increasing energy and food demands. Although  
365 social objectives that benefit humanity are clearly important, they cannot all be  
366 achieved sustainably without limiting the degradation of the ecosystems supporting  
367 all life<sup>1</sup>. Integrated assessments of how we can achieve multiple social objectives  
368 while effectively conserving biodiversity at a global scale are important avenues for  
369 future research<sup>63</sup>.

370 The world's nations are discussing post-2020 biodiversity conservation targets  
371 within the CBD and wider Sustainable Development Goals international agenda.  
372 These targets will define the global conservation agenda for at least the next decade,  
373 so it is crucial that they are adequate to achieve biodiversity outcomes<sup>10</sup>. Our  
374 analyses show that a minimum of 44% of land requires conservation attention,  
375 through both site- and landscape-scale approaches, which should serve as an  
376 ecological foundation for negotiations. Governments failed to meet the CBDs  
377 previous Aichi Targets suggesting a need to reimagine how conservation is done<sup>64</sup>.  
378 Our finding that over 1.8 billion people live on lands requiring conservation attention  
379 further supports the need for dramatic shifts in conservation strategies. The  
380 implementation of conservation actions must put the rights of Indigenous Peoples  
381 and local communities, socio-environmental justice and human rights frameworks at  
382 their centre. As such, conservation scientists have an opportunity to scale up their  
383 role as capacity builders for the communities that request their expertise. If CBD

384 signatory nations are serious about safeguarding the biodiversity and ecosystem  
385 services that underpin all life on earth<sup>1,63</sup>, then they need to recognise that  
386 conservation action must be immediately and substantially scaled-up, in extent,  
387 intensity, sophistication and effectiveness.

## 388 **Methods**

### 389 **Mapping important conservation areas**

390 We obtained spatial data on the location of protected areas from the February 2020  
391 version of the World Database on Protected Areas (WDPA)<sup>27</sup>. This edition does not  
392 contain data on protected areas in China, which have largely been removed from the  
393 publicly accessible WDPA in more recent versions. We therefore used the January  
394 2017 version of the WDPA for China, since this is the most recent version with  
395 China's full complement of protected areas. In total, we had location data for 253,797  
396 protected areas. We handled the WDPA data according to best-practice guidelines  
397 that are available on the protected planet website  
398 (<https://www.protectedplanet.net/c/calculating-protected-areacoverage>) and included  
399 regionally, nationally and internationally designated protected areas. We included all  
400 protected areas in the database regardless of their IUCN management category  
401 because these categories are not globally consistent. The WDPA dataset contains  
402 protected areas represented as point data. In these cases, we converted the points  
403 to polygons by setting a geodesic buffer around the point based on the areal  
404 attributes of that point. We excluded points with no areal attributes. We also  
405 excluded all marine protected areas, 'proposed' protected areas, and UNESCO Man  
406 and Biosphere Reserves since their core conservation areas often overlap with other  
407 protected areas and their buffer zones' primary goals are not biodiversity  
408 conservation. Finally, we flattened (i.e. dissolved) the protected area data to remove  
409 any overlapping protected areas.

410 We obtained data on the boundaries of 14,192 KBAs from the September  
411 2019 version of the World Database of Key Biodiversity Areas<sup>28</sup>. KBAs documented  
412 with point data were treated as outlined above for protected areas. The KBA dataset  
413 includes sites identified under previously established criteria such as Important Bird  
414 and Biodiversity Areas (IBAs)<sup>65</sup> and Alliance for Zero Extinction sites (AZEs)<sup>66</sup> (as  
415 the KBA Standard explicitly state that these sites are encompassed by KBAs), and  
416 the KBA criteria builds closely on these previous criteria<sup>16</sup>. Although the KBA criteria  
417 have been applied most comprehensively to birds, in the September 2019 version of  
418 the KBA dataset, 53% of species that trigger the criteria are non-avian, and 35% of  
419 sites are triggered by non-avian species. These proportions are increasing as the

420 standard is applied more widely to non-birds, and many bird-triggered KBAs are  
421 likely to prove important for other species<sup>65</sup>. We obtained global data on the extent of  
422 ecologically intact areas from Allan, et al. <sup>29</sup>, who utilised maps of ‘pressure-free  
423 lands’. Previous analyses have referred to these pressure free lands as wilderness  
424 areas, but here we avoid the term, preferring ‘ecologically intact’ since the word  
425 wilderness is sometimes associated with a legacy of violence that has been  
426 perpetrated to promote it and is therefore offensive to some people.

427 We merged protected areas, KBAs and ecologically intact areas together,  
428 removing overlaps (i.e. again flattened the merged datasets) to create a global  
429 template of “existing important conservation areas”.

### 430 **Distribution and representation of biodiversity**

431 We obtained data on the distributions of terrestrial mammals ( $n = 5,617$ ), amphibians  
432 ( $n = 6,577$ ), freshwater crabs ( $n = 1,285$ ), shrimp ( $n = 692$ ) and crayfish ( $n = 496$ )  
433 from the IUCN Red List of Threatened Species<sup>67</sup>. Bird distribution data ( $n = 10,926$ )  
434 were sourced from BirdLife International and Handbook of the Birds of the World<sup>68</sup>,  
435 and reptile data ( $n = 9,964$ ) from Roll, et al. <sup>69</sup>. These represent the most  
436 comprehensive spatial databases for these taxonomic groups. We excluded species  
437 that are extinct, possibly extinct, or if their presence is uncertain. We did not account  
438 for sub-species. The freshwater species ranges are mapped at the watershed level  
439 which is generally coarser than the 30 × 30 km resolution of our spatial analysis.  
440 Since freshwater species are likely to only inhabit a small area within the  
441 watersheds, there is a chance of commission errors, where a species is falsely  
442 identified as present. In regions with larger hydro sheds the probability of  
443 commission errors increases. There is also a higher likelihood of commission errors  
444 in less surveyed regions such as the global tropics, where there are also many  
445 narrow-ranged species. This is important information for interpreting the results, and  
446 highlights the need for downscaled national level analyses using best available local  
447 data. We also included data on the distribution of 845 terrestrial ecoregions<sup>31</sup>, which  
448 are bio-geographically distinct spatial units at the global scale.

449 We set representation targets for the percentage of each species’ distribution  
450 that should be effectively conserved, following previous studies (Rodrigues, et al. <sup>30</sup>,  
451 Venter, et al. <sup>14</sup>, and Butchart, et al. <sup>15</sup>). Targets were set as a function of a species’

452 range size, and were log-linearly scaled between 10% for species with distributions  
453 >250,000 km<sup>2</sup>, to 100% for species with ranges <1,000 km<sup>2</sup>. We limited the target for  
454 species with large ranges to 1 million km<sup>2</sup> maximum<sup>15</sup>. We acknowledge that other  
455 target setting approaches exist, for example based on minimising species extinction  
456 risk<sup>70</sup>. However, these are not as widely adopted as the approach we followed here.  
457 We also acknowledge that scaling targets for species based on range size may not  
458 always be sufficient to guarantee persistence for all species. That said, it is the most  
459 widely used “best practice” target setting approach. For each ecoregion, we followed  
460 Venter et al.<sup>14</sup> by setting a coverage target of 17%, in line with Aichi Target 11 of the  
461 Strategic Plan for Biodiversity<sup>3</sup>. We acknowledge that Aichi Target 11 expired in  
462 2020 but the nature of the post-2020 targets is still under discussion, and that the  
463 17% value is arbitrary and was determined through negotiation. We carried out a  
464 “gap analysis” by calculating the proportion of each species’ range that currently  
465 overlaps with the important conservation areas, and comparing this with each  
466 species’ coverage target to identify under-represented species and the extent of  
467 additional range each requires.

#### 468 **Priority areas for the expansion of conservation efforts**

469 We identify spatial priorities for meeting species conservation targets, whilst  
470 accounting for current protection within existing important conservation areas, and  
471 minimizing the cost (the area of a planning unit) of the areas selected<sup>71</sup>. We solve  
472 this using the mathematical optimisation ‘minimum set problem’ (also known as the  
473 ‘reserve selection problem’), an integer linear programming problem, using Gurobi  
474 (version 5.6.2) following the methods developed by Beyer, et al.<sup>72</sup>. Integer linear  
475 programming is an effective, exact method for solving optimisation problems, which  
476 minimises or maximises an objective function subject to constraints conditional on  
477 the decision variables being integers<sup>72</sup>. Specifically, we solved the reserve selection  
478 problem as follows:

$$\begin{aligned} \min. \quad & \sum_{i=1}^N c_i x_i \\ \text{subject to} \quad & \sum_{i=1}^N r_{ik} x_i \geq T_k, k \in K \\ & x_i \in \{0,1\}, i \in N \end{aligned}$$

479

480 where  $x_i$  is a binary decision variable determining whether planning unit  $i$  is  
481 selected (1) or not (0), and  $c_i$  represents the cost of planning unit  $i$  or, in this case the  
482 objective is to select the smallest number of planning units, so  $c_i = 1$  for every  $i$ . The  
483 parameter  $r_{ik}$  is the contribution of planning unit  $i$  to feature  $k$  and  $T_k$  is the minimum  
484 target (described above) to be achieved for feature  $k$  among all planning units. We  
485 applied a threshold specifying that solutions must be within 0.5% of the optimum<sup>72</sup>,  
486 which returns a near-optimal solution.

487 To run the analysis, we first created a  $30 \times 30$  km ( $900 \text{ km}^2$ ) global planning  
488 unit grid. This resolution limits the risk of commission errors when working with the  
489 available species distribution data (e.g. assuming a species is present when it is  
490 not)<sup>15,73</sup>. Planning units were clipped to terrestrial areas and inland lakes and  
491 waterways so that freshwater taxa could be included. We included Antarctica and  
492 Greenland. We calculated the area of each conservation feature (e.g. species  
493 distribution and ecoregion distribution) within each planning unit, including the area  
494 within existing important conservation areas. All geospatial data processing was  
495 carried out in the Mollweide equal-area projection using a spatially enabled  
496 PostgreSQL database (using PostGIS version 2.2) or in ESRI ArcGIS version 10.5.1.

497 We used the area of a planning unit as a surrogate for the cost of  
498 conservation in that planning unit. Seeking to minimise area is advantageous  
499 because it supports our aim of identifying the minimum area requiring conservation  
500 attention globally. There is also evidence that area is a good proxy for cost, reducing  
501 uncertainties created in the absence of fine scale and accurate cost data<sup>74</sup>. Other  
502 widely used cost metrics such as the human footprint<sup>75,76</sup> and agricultural  
503 opportunity<sup>77</sup> costs do not extend to Antarctica or remote sub-Antarctic islands  
504 further supporting our choice of area as the most suitable cost metric.

505 To explore how sensitive our results are to the choice of cost metric we ran  
506 the prioritisation analyses again using two other cost layers: the sum human footprint  
507 and the agricultural opportunity cost of a planning unit. The human footprint is a map  
508 of cumulative human pressure on the natural environment for the year 2009 at a  
509  $1 \text{ km}^2$  resolution globally<sup>75,76</sup>. The agricultural opportunity data is a global map of the  
510 gross economic rents of agricultural lands<sup>77</sup>. We assumed that conservation will be



511 cheaper and more feasible in areas with less human influence and lower agricultural  
512 opportunity. We excluded Antarctica and sub-Antarctic islands from this sensitivity  
513 analysis. We found that the priorities identified using different cost layers overlap by  
514 58% on average (ranging from 36–75% overlap) (Extended Data Table 7; Extended  
515 Data Figure 3). This demonstrates that our results are somewhat sensitive to cost,  
516 but are also driven to large extent by the distribution of biodiversity features.

517 We accounted for current land-use in our analyses by excluding places  
518 classified as ‘built areas’, assuming they are unavailable for conservation. By built  
519 areas we mean cities and major urban centres that contain no original habitat. Data  
520 on the extent of built areas was obtained from the European Space Agency (ESA)  
521 Climate Change Initiative (CCI) who have developed globally consistent landcover  
522 maps at a 300 m resolution for the year 2015, classing the world into 22 land use  
523 categories<sup>78</sup>. We extracted land use category 190 which represents urban areas and  
524 resampled the data to a 1 km<sup>2</sup> resolution where a pixel was considered a built area if  
525 >50% of its area was urban. In the results presented in the main manuscript we  
526 assumed all other land-uses including current agricultural areas are available for  
527 conservation since they can be restored, and our aim is to identify the ‘minimum area  
528 requiring conservation attention’ even if that means including places requiring  
529 restoration. Some KBAs contain urban areas because the management units they  
530 represent contain such urban areas, or, more rarely, they support significant  
531 populations of species of conservation concern in these locations. We did not  
532 account for this in the analyses, so the urban extent of these KBAs would have been  
533 considered unavailable for meeting species representation targets. This means that  
534 the 44% of Earth’s surface that we calculated is a slight underestimate of the true  
535 extent requiring conservation attention.

536 To assess the sensitivity of our results to current land use we ran the  
537 prioritisation again excluding both built areas and current agricultural extent,  
538 assuming this land is unavailable for conservation (Extended Data Figure 3). Data on  
539 agricultural extent was also obtained from the ESA CCI<sup>78</sup>. We extracted land-use  
540 categories 10; rainfed cropland, 11; herbaceous cover, 12; tree or shrub cover, 20;  
541 irrigated or post flooding cropland, and 30; mosaic cropland, converted this into a  
542 binary agriculture is present/absent layer and resampled to 1 km<sup>2</sup> resolution where a  
543 pixel was considered agriculture if >50% of its area was covered by agricultural land-

544 use. We found that when we exclude both built areas and agricultural land (and used  
545 planning unit area as a cost) the land area requiring conservation is 695,633 km<sup>2</sup>  
546 lower than when agriculture was included. However, this is because 5,182 species  
547 (14.6%) cannot meet their representation targets when the model cannot select  
548 areas under current agriculture, resulting in an insufficient conservation plan.

549 By running the prioritisation with different cost layers and land-use constraints,  
550 we identify different spatial solutions that meet the species distribution coverage  
551 targets. This demonstrates that there is considerable spatial freedom in identifying  
552 priority conservation areas. The fact that not all targets could be met when  
553 agricultural and urban land was locked out also demonstrates the bounds of this  
554 freedom. Finding multiple near optimal spatial solutions to conservation planning  
555 problems is one of the most important functionalities of conservation planning tools  
556 since it allows decision makers to assess multiple options for achieving their goals.

557 It is possible to create conservation plans where each country must conserve  
558 the same proportion of their area<sup>79</sup>; however, this leads to costly inefficient plans<sup>59</sup>,  
559 and would be inconsistent with our aim of identifying the minimum most important  
560 area requiring conservation. Therefore, we ran the prioritisation at the global scale.

## 561 **Future threats to conservation areas**

562 To map the risk of habitat conversion occurring in the conservation areas identified,  
563 we utilised spatially explicit data on future land-use scenarios from the newly  
564 released Land Use Harmonisation Dataset v2 (<http://luh.umd.edu/>)<sup>35</sup>. To determine  
565 optimistic, middle-of-the-road, and pessimistic scenarios, we evaluated projections  
566 under three different Shared Socioeconomic Pathways (SSPs)<sup>36</sup>, which are linked to  
567 Representative Concentration Pathways (RCPs)<sup>37</sup>: specifically, SSP1 (RCP2.6;  
568 IMAGE), an optimistic scenario where the world gradually moves towards a more  
569 sustainable future, SSP2 (MESSAGE-GLOBIOM) a middle-of-the-road scenario  
570 without any extreme changes towards or away from sustainability, and SSP3  
571 (RCP7.0; AIM), a pessimistic scenario where land use change is poorly regulated.

572 The harmonised land-use data contains 12 state layers (with the unit being  
573 the fraction of a grid cell in that state) for the years 2015 (current baseline), 2030 and  
574 2050. We considered four of the state layers as natural land-cover classes,  
575 including; primary forested land, primary non-forested land, potentially forested

576 secondary land, and potentially non-forested secondary land (Extended Data Figure  
577 4). Using these four classes, we calculated the proportion of natural land projected to  
578 be lost (converted to human uses) by the years 2030 and 2050 in each 30 x 30 km  
579 grid cell. From this we calculated the area of natural land projected to be lost within  
580 each grid cell. We assume that once land is converted it remains converted.  
581 Antarctica and remote islands were excluded from this part of the analyses because  
582 the land-use data does not extend to them. We also created an “ensemble” scenario,  
583 where we calculated the average area of natural land projected to be converted in  
584 each pixel across all three SSPs (Extended Data Figure 5).

### 585 **Estimating the human population in areas requiring conservation**

586 We used LandScan's global population distribution model for the year 2018<sup>38</sup> to  
587 estimate the number of people living within areas requiring conservation. We  
588 expanded on methods used by Schleicher et al.<sup>80</sup>, who used LandScan to measure  
589 the populations living in the least populated ecoregions. Data were extracted to  
590 estimate the area and number of people found within places requiring conservation.  
591 These were then tabulated using the database of Global Administrative Areas  
592 (GADM 2020) to provide measures for each territory. Population data were  
593 calculated in raster format at a resolution of 30 by 30 arc seconds, approximately 1  
594 km<sup>2</sup> (835m<sup>2</sup>). LandScan population data represents an ambient population (average  
595 over 24 hours).

## 596 References

- 597 1 IPBES. Summary for policymakers of the global assessment report on biodiversity and  
598 ecosystem services of the Intergovernmental Science-Policy Platform and Biodiversity and  
599 Ecosystem Services. (IPBES secretariat, Bonn, Germany, 2019).
- 600 2 CBD. Conference of the Parties to the Convention on Biological Diversity: Long-term strategic  
601 directions to the 2050 vision for biodiversity, approaches to living in harmony with nature  
602 and preparation for the post-2020 global biodiversity framework. *CBD/COP/14/9* (2018).
- 603 3 CBD. Conference of the parties decision X/2 Strategic Plan for Biodiversity 2011 - 2020.  
604 Convention on Biological Diversity. (<https://www.cbd.int/decision/cop/?id=12268>, 2011).
- 605 4 Larsen, F. W., Turner, W. R. & Mittermeier, R. A. Will protection of 17% of land by 2020 be  
606 enough to safeguard biodiversity and critical ecosystem services? *Oryx* **49**, 74-79,  
607 doi:10.1017/S0030605313001348 (2014).
- 608 5 CBD. *Twenty-third meeting of the Subsidiary Body on Scientific, Technical and Technological*  
609 *Advice. 25-29 November 2019. Montreal, Canada*, <[https://www.cbd.int/meetings/SBSTTA-](https://www.cbd.int/meetings/SBSTTA-23)  
610 [23](https://www.cbd.int/meetings/SBSTTA-23)> (2019).
- 611 6 Maron, M., Simmonds, J. S. & Watson, J. E. M. Bold nature retention targets are essential for  
612 the global environment agenda. *Nature Ecology & Evolution* **2**, 1194-1195,  
613 doi:10.1038/s41559-018-0595-2 (2018).
- 614 7 Pimm, S. L., Jenkins, C. N. & Li, B. V. How to protect half of Earth to ensure it protects  
615 sufficient biodiversity. *Science Advances* **4**, doi:10.1126/sciadv.aat2616 (2018).
- 616 8 Baillie, J. & Zhang, Y.-P. Space for nature. *Science* **361**, 1051-1051,  
617 doi:10.1126/science.aau1397 (2018).
- 618 9 Dinerstein, E. *et al.* A Global Deal For Nature: Guiding principles, milestones, and targets.  
619 *Science Advances* **5**, eaaw2869, doi:10.1126/sciadv.aaw2869 (2019).
- 620 10 Visconti, P. *et al.* Protected area targets post-2020. *Science* **364**, 239-241,  
621 doi:10.1126/science.aav6886 (2019).
- 622 11 Jones, K. R. *et al.* Area requirements to safeguard Earth's marine species. *bioRxiv*, 808790,  
623 doi:10.1101/808790 (2019).
- 624 12 Sala, E. *et al.* Protecting the global ocean for biodiversity, food and climate. *Nature* **592**, 397-  
625 402, doi:10.1038/s41586-021-03371-z (2021).
- 626 13 Boyd, C. *et al.* Spatial scale and the conservation of threatened species. *Conservation Letters*  
627 **1**, 37-43, doi:10.1111/j.1755-263X.2008.00002.x (2008).
- 628 14 Venter, O. *et al.* Targeting Global Protected Area Expansion for Imperiled Biodiversity. *PLOS*  
629 *Biology* **12**, e1001891, doi:10.1371/journal.pbio.1001891 (2014).
- 630 15 Butchart, S. H. M. *et al.* Shortfalls and Solutions for Meeting National and Global  
631 Conservation Area Targets. *Conservation Letters* **8**, 329-337, doi:10.1111/conl.12158 (2015).
- 632 16 IUCN. A Global Standard for the Identification of Key Biodiversity Areas. (Gland, Switzerland:  
633 IUCN, 2016).
- 634 17 Watson, J. E. M. *et al.* Protect the last of the wild. *Nature* **536**, 27 - 30 (2018).
- 635 18 Soule, M. E. *et al.* The role of connectivity in Australian conservation. *Pacific Conservation*  
636 *Biology* **10**, 266-279, doi:<https://doi.org/10.1071/PC040266> (2004).
- 637 19 Di Marco, M., Ferrier, S., Harwood, T. D., Hoskins, A. J. & Watson, J. E. M. Wilderness areas  
638 halve the extinction risk of terrestrial biodiversity. *Nature* **573**, 582-585,  
639 doi:10.1038/s41586-019-1567-7 (2019).
- 640 20 Mantyka-Pringle, C. S. *et al.* Climate change modifies risk of global biodiversity loss due to  
641 land-cover change. *Biological Conservation* **187**, 103-111, doi:10.1016/j.biocon.2015.04.016  
642 (2015).
- 643 21 Pan, Y. *et al.* A Large and Persistent Carbon Sink in the World's Forests. *Science* **333**, 988-  
644 993, doi:10.1126/science.1201609 (2011).

- 645 22 Lamb, C. T., Festa-Bianchet, M. & Boyce, M. S. Invest long term in Canada's wilderness.  
646 *Science* **359**, 1002-1002, doi:10.1126/science.aat1104 (2018).
- 647 23 Sampaio, G. *et al.* Regional climate change over eastern Amazonia caused by pasture and  
648 soybean cropland expansion. *Geophysical Research Letters* **34**, L17709,  
649 doi:10.1029/2007gl030612 (2007).
- 650 24 Smith, R. J. *et al.* Synergies between the key biodiversity area and systematic conservation  
651 planning approaches. *Conservation Letters* **12**, e12625, doi:doi:10.1111/conl.12625 (2019).
- 652 25 Watson, J. E. M. *et al.* Catastrophic declines in wilderness areas undermine global  
653 environmental targets. *Current Biology* (2016).
- 654 26 Kullberg, P., Di Minin, E. & Moilanen, A. Using key biodiversity areas to guide effective  
655 expansion of the global protected area network. *Global Ecology and Conservation* **20**,  
656 e00768, doi:<https://doi.org/10.1016/j.gecco.2019.e00768> (2019).
- 657 27 IUCN and UNEP-WCMC. *World Database on Protected Areas (WDPA)*,  
658 <[www.protectedplanet.net](http://www.protectedplanet.net)> (2020).
- 659 28 Birdlife International. *World Database of Key Biodiversity Areas (KBAs). Developed by the*  
660 *KBA Partnership.*, <[www.keybiodiversityareas.org](http://www.keybiodiversityareas.org)> (2017).
- 661 29 Allan, J. R., Venter, O. & Watson, J. E. M. Temporally inter-comparable maps of terrestrial  
662 wilderness and the Last of the Wild. *Scientific Data* **4**, 170187, doi:10.1038/sdata.2017.187  
663 (2017).
- 664 30 Rodrigues, A. S. L. *et al.* Effectiveness of the global protected area network in representing  
665 species diversity. *Nature* **428**, 640-643,  
666 doi:[http://www.nature.com/nature/journal/v428/n6983/supinfo/nature02422\\_S1.html](http://www.nature.com/nature/journal/v428/n6983/supinfo/nature02422_S1.html)  
667 (2004).
- 668 31 Olson, D. N. *et al.* Terrestrial ecoregions of the world: a new map of life on Earth. *BioScience*  
669 **51**, 933 - 938 (2001).
- 670 32 Sacre, E., Bode, M., Weeks, R. & Pressey, R. L. The context dependence of frontier versus  
671 wilderness conservation priorities. *Conservation Letters* **12**, e12632, doi:10.1111/conl.12632  
672 (2019).
- 673 33 Allan, J. R. *et al.* Hotspots of human impact on threatened terrestrial vertebrates. *PLOS*  
674 *Biology* **17**, e3000158, doi:10.1371/journal.pbio.3000158 (2019).
- 675 34 Davis, K. F. *et al.* Tropical forest loss enhanced by large-scale land acquisitions. *Nature*  
676 *Geoscience* **13**, 482-488, doi:10.1038/s41561-020-0592-3 (2020).
- 677 35 Hurtt, G., Chini, L., Sahajpal, R. & Froking, S. *Harmonization of global land-use change and*  
678 *management for the period 850-2100*, <<http://luh.umd.edu/>> (2016).
- 679 36 O'Neill, B. C. *et al.* The roads ahead: Narratives for shared socioeconomic pathways  
680 describing world futures in the 21st century. *Global Environmental Change* **42**, 169-180,  
681 doi:<https://doi.org/10.1016/j.gloenvcha.2015.01.004> (2017).
- 682 37 van Vuuren, D. P. *et al.* The representative concentration pathways: an overview. *Climatic*  
683 *Change* **109**, 5, doi:10.1007/s10584-011-0148-z (2011).
- 684 38 Rose, A. N. (ed Oak Ridge National Laboratory SE) (Oak Ridge TN, 2019).
- 685 39 Brockington, D., Igoe, J. & Schmidt-Soltau, K. Conservation, Human Rights, and Poverty  
686 Reduction. *Conservation Biology* **20**, 250-252, doi:[https://doi.org/10.1111/j.1523-](https://doi.org/10.1111/j.1523-1739.2006.00335.x)  
687 [1739.2006.00335.x](https://doi.org/10.1111/j.1523-1739.2006.00335.x) (2006).
- 688 40 Brockington, D. & Igoe, J. Eviction for Conservation: A Global Overview. *Conservation and*  
689 *Society* **4**, 424-470 (2006).
- 690 41 Duffy, R. *et al.* Why we must question the militarisation of conservation. *Biological*  
691 *Conservation* **232**, 66-73, doi:<https://doi.org/10.1016/j.biocon.2019.01.013> (2019).
- 692 42 IPE. Embedding human rights in nature conservation: From intent to action. Report of the  
693 Independent Panel of Experts of the Independent Review of allegations raised in the media  
694 regarding human rights violations in the context of WWF's conservation work. (2020).

- 695 43 RRI. Estimate of the area of land and territories of Indigenous Peoples, local communities,  
696 and Afro-descendant Peoples where their rights have not been recognized. Rights and  
697 Resources Initiative., (Washington D.C.  
698 Rights and Resources Initiative., 2020).
- 699 44 RRI. The Opportunity Framework: Identifying Opportunities to Invest in Securing Collective  
700 Tenure Rights in the Forest Areas of Low and Lower Middle Income Countries., (Rights and  
701 Resources Initiative. Washington D.C., 2020).
- 702 45 Worsdell, T. *et al.* Rights-Based Conservation: The path to preserving Earth's biological and  
703 cultural diversity? Rights and Resources Institute. (2020).
- 704 46 LBO. Forest Peoples Programme, International Indigenous Forum on Biodiversity, Indigenous  
705 Women's Biodiversity Network, Centres of Distinction on Indigenous and Local Knowledge  
706 and Secretariat of the Convention on Biological Diversity. (2020) Local Biodiversity Outlooks  
707 2: The contributions of indigenous peoples and local communities to the implementation of  
708 the Strategic Plan for Biodiversity 2011–2020 and to renewing nature and cultures. A  
709 complement to the fifth edition of Global Biodiversity Outlook. . (Moreton-in-Marsh.  
710 England: Forest Peoples Programme., 2020).
- 711 47 Moran, D. & Kanemoto, K. Identifying species threat hotspots from global supply chains.  
712 *Nature Ecology & Evolution* **1**, 0023, doi:10.1038/s41559-016-0023  
713 <http://www.nature.com/articles/s41559-016-0023#supplementary-information> (2017).
- 714 48 CBD. Zero Draft of the Post-2020 Global Biodiversity Framework. (2020).
- 715 49 Watson, J. E. M. *et al.* The exceptional value of intact forest ecosystems. *Nature Ecology &*  
716 *Evolution*, doi:10.1038/s41559-018-0490-x (2018).
- 717 50 Renwick, A. R., Bode, M. & Venter, O. Reserves in Context: Planning for Leakage from  
718 Protected Areas. *PLOS ONE* **10**, e0129441, doi:10.1371/journal.pone.0129441 (2015).
- 719 51 FILAC, F. a. Forest governance by indigenous and tribal peoples. An opportunity for climate  
720 action in Latin America and the Caribbean., (Latin America and the Caribbean, 2021).
- 721 52 Corson, C., Flores-Ganley, I., Worcester, J. & Rogers, S. From paper to practice? Assembling a  
722 rights-based conservation approach. *Journal of Political Ecology* **27**, 1128-1147 (2020).
- 723 53 Tauli-Corpuz, V., Alcorn, J., Molnar, A., Healy, C. & Barrow, E. Cornered by PAs: Adopting  
724 rights-based approaches to enable cost-effective conservation and climate action. *World*  
725 *Development* **130**, 104923, doi:<https://doi.org/10.1016/j.worlddev.2020.104923> (2020).
- 726 54 Arlidge, W. N. S. *et al.* A Global Mitigation Hierarchy for Nature Conservation. *BioScience* **68**,  
727 336-347, doi:10.1093/biosci/biy029 (2018).
- 728 55 IFC. International Finance Corporation. Performance Standard 6. Biodiversity and  
729 Sustainable Management of Living Natural Resources. (2012).
- 730 56 United Nations. Report of the United Nations Conference on Environment and Development.  
731 Rio Declaration on Environment and Development. *A/CONF.151/26 Vol. I* (1992).
- 732 57 United Nations. Paris Agreement (United Nations). December 2015., (2015).
- 733 58 Armstrong, C. Sharing conservation burdens fairly. *Conservation Biology* **33**, 554-560,  
734 doi:10.1111/cobi.13260 (2019).
- 735 59 Allan, J. R. *et al.* Navigating the complexities of coordinated conservation along the river  
736 Nile. *Science Advances* **5**, eaau7668, doi:10.1126/sciadv.aau7668 (2019).
- 737 60 Di Marco, M. *et al.* Projecting impacts of global climate and land-use scenarios on plant  
738 biodiversity using compositional-turnover modelling. *Global Change Biology* **25**, 2763-2778,  
739 doi:10.1111/gcb.14663 (2019).
- 740 61 Ponce-Reyes, R. *et al.* Forecasting ecosystem responses to climate change across Africa's  
741 Albertine Rift. *Biological Conservation* **209**, 464-472,  
742 doi:<https://doi.org/10.1016/j.biocon.2017.03.015> (2017).
- 743 62 Büscher, B. *et al.* Half-Earth or Whole Earth? Radical ideas for conservation, and their  
744 implications. *Oryx* **51**, 407-410, doi:10.1017/S0030605316001228 (2016).

- 745 63 Tallis, H. M. *et al.* An attainable global vision for conservation and human well-being.  
746 *Frontiers in Ecology and the Environment* **16**, 563-570, doi:10.1002/fee.1965 (2018).
- 747 64 Díaz, S. *et al.* Pervasive human-driven decline of life on Earth points to the need for  
748 transformative change. *Science* **366**, eaax3100, doi:10.1126/science.aax3100 (2019).
- 749 65 Donald, P. F. *et al.* Important Bird and Biodiversity Areas (IBAs): the development and  
750 characteristics of a global inventory of key sites for biodiversity. *Bird Conservation*  
751 *International* **29**, 177-198, doi:10.1017/S0959270918000102 (2019).
- 752 66 Ricketts, T. H. *et al.* Pinpointing and preventing imminent extinctions. *Proceedings of the*  
753 *National Academy of Sciences of the United States of America* **102**, 18497-18501,  
754 doi:10.1073/pnas.0509060102 (2005).
- 755 67 IUCN. *The IUCN Red List of Threatened Species*, <<http://www.iucnredlist.org>> (2017).
- 756 68 BirdLife. Birdlife International and Handbook of the Birds of the World: Bird species  
757 distribution maps of the world. Version 2020.1. . (2020).
- 758 69 Roll, U. *et al.* The global distribution of tetrapods reveals a need for targeted reptile  
759 conservation. *Nature Ecology & Evolution* **1**, 1677-1682, doi:10.1038/s41559-017-0332-2  
760 (2017).
- 761 70 Mogg, S., Fastre, C., Jung, M. & Visconti, P. Targeted expansion of Protected Areas to  
762 maximise the persistence of terrestrial mammals. *bioRxiv*, 608992, doi:10.1101/608992  
763 (2019).
- 764 71 Jantke, K. *et al.* Poor ecological representation by an expensive reserve system: Evaluating  
765 35 years of marine protected area expansion. *Conservation Letters* **11**, e12584,  
766 doi:10.1111/conl.12584 (2018).
- 767 72 Beyer, H. L., Dujardin, Y., Watts, M. E. & Possingham, H. P. Solving conservation planning  
768 problems with integer linear programming. *Ecological Modelling* **328**, 14-22,  
769 doi:<https://doi.org/10.1016/j.ecolmodel.2016.02.005> (2016).
- 770 73 Di Marco, M., Watson, J. E. M., Possingham, H. P. & Venter, O. Limitations and trade-offs in  
771 the use of species distribution maps for protected area planning. *Journal of Applied Ecology*  
772 **54**, 402-411, doi:10.1111/1365-2664.12771 (2017).
- 773 74 Cheok, J., Pressey, R. L., Weeks, R., Andréfouët, S. & Moloney, J. Sympathy for the Devil:  
774 Detailing the Effects of Planning-Unit Size, Thematic Resolution of Reef Classes, and  
775 Socioeconomic Costs on Spatial Priorities for Marine Conservation. *PLOS ONE* **11**, e0164869,  
776 doi:10.1371/journal.pone.0164869 (2016).
- 777 75 Venter, O. *et al.* Global terrestrial Human Footprint maps for 1993 and 2009. *Scientific Data*  
778 **3**, 160067, doi:10.1038/sdata.2016.67 (2016).
- 779 76 Venter, O. *et al.* Sixteen years of change in the global terrestrial human footprint and  
780 implications for biodiversity conservation. *Nature Communications* **7**, 12558,  
781 doi:10.1038/ncomms12558 (2016).
- 782 77 Naidoo, R. & Iwamura, T. Global-scale mapping of economic benefits from agricultural lands:  
783 Implications for conservation priorities. *Biological Conservation* **140**, 40-49,  
784 doi:10.1016/j.biocon.2007.07.025 (2007).
- 785 78 ESA. (2017).
- 786 79 Montesino Pouzols, F. *et al.* Global protected area expansion is compromised by projected  
787 land-use and parochialism. *Nature* **516**, 383-386, doi:10.1038/nature14032 (2014).
- 788 80 Schleicher, J. *et al.* Protecting half of the planet could directly affect over one billion people.  
789 *Nature Sustainability* **2**, 1094-1096, doi:10.1038/s41893-019-0423-y (2019).

790

791

792 **Acknowledgements**

793 We thank Peadar Brehony, Peter Tyrell, Chris Sandbrook, Oscar Venter and Piero  
794 Visconti for thoughtful comments on the manuscript.

795

796 **Author Contributions**

797 J.R.A, J.E.M.W, and H.P.P. framed the study. J.R.A., S.C.A., M.D.M., G.G., P.M.  
798 carried out the analyses. All authors discussed and interpreted the results. J.R.A  
799 wrote the manuscript with support from all authors.

800

801 **Competing interests**

802 The authors declare no financial competing interests. The authors who work for the  
803 Wildlife Conservation Society acknowledge that wilderness conservation is part of  
804 their organisation's agenda. Similarly, the Authors from BirdLife international  
805 acknowledge that Key Biodiversity Areas are part of their organisational agenda.
