1

2

# 3 **Conservation attention necessary across at least 44% of Earth's** 4 **terrestrial area to safeguard biodiversity**

5

6 **Abbreviated Title:** Land area needed to conserve biodiversity

## 7 **Authors**

8 James R. Allan<sup>\*1,2,3</sup>, Hugh P. Possingham<sup>2,4</sup>, Scott C. Atkinson<sup>2,5</sup>, Anthony  
9 Waldron<sup>6</sup>, Moreno Di Marco<sup>7,8</sup>, Vanessa M. Adams<sup>9</sup>, Stuart H. M. Butchart<sup>10,11</sup>,  
10 Oscar Venter<sup>12</sup>, Martine Maron<sup>2,8</sup>, Brooke A. Williams<sup>2,8</sup>, Kendall R. Jones<sup>13</sup>, Piero  
11 Visconti<sup>14</sup>, Brendan A. Wintle<sup>15</sup>, April E. Reside<sup>2,8</sup>, James E.M. Watson<sup>2,8,13</sup>

## 12 **Affiliations**

13 <sup>1</sup>School of Biological Sciences, University of Queensland, St Lucia QLD 4072, Australia

14 <sup>2</sup>Centre for Biodiversity and Conservation Science, The University of Queensland, St Lucia, QLD  
15 4072, Australia

16 <sup>3</sup>Institute for Biodiversity and Ecosystem Dynamics (IBED), University of Amsterdam, P.O. Box 94240,  
17 1090 GE, Amsterdam, The Netherlands

18 <sup>4</sup>The Nature Conservancy, VA 22203-1606, USA

19 <sup>5</sup>United Nations Development Programme (UNDP), New York, New York, USA

20 <sup>6</sup>Cambridge Conservation Initiative, David Attenborough Building, Department of Zoology, Cambridge  
21 University, Cambridge CB2 3QZ, UK

22 <sup>7</sup>Department of Biology and Biotechnologies, Sapienza University of Rome, viale dell'Università 32, I-  
23 00185 Rome, Italy

24 <sup>8</sup>School of Earth and Environmental Sciences, The University of Queensland, St Lucia QLD 4072,  
25 Australia

26 <sup>9</sup>School of Technology, Environments & Design, University of Tasmania, Hobart, TAS 7001, Australia

27 <sup>10</sup>BirdLife International, David Attenborough Building, Pembroke Street, Cambridge CB2 3QZ, UK.

28 <sup>11</sup>Department of Zoology, University of Cambridge, Downing Street, Cambridge CB2 3EJ, UK.

29 <sup>12</sup>Natural Resource and Environmental Studies Institute, University of Northern British Columbia,  
30 Prince George, V2N4Z9, Canada

31 <sup>13</sup>Wildlife Conservation Society, Global Conservation Program, 2300 Southern Boulevard, Bronx, NY  
32 10460-1068, USA

33 <sup>14</sup>International Institute for Applied System Analyses, Schlossplatz 1, A-2361 Laxenburg, Austria

34 <sup>15</sup>School of BioSciences, University of Melbourne, Vic., Australia

35

36 **Keywords** Conservation, Aichi Targets, Protected Areas, Prioritisation, Conservation  
37 Planning, Restoration, Threatened Species, Strategic Plan for Biodiversity,  
38 Convention on Biological Diversity, Terrestrial biodiversity.

39 \*Correspondence to: James R. Allan. E-mail: [James.allan@uqconnect.edu.au](mailto:James.allan@uqconnect.edu.au)

40 **More ambitious conservation efforts are needed to stop the global degradation**  
41 **of ecosystems and the extinction of the species that comprise them. Here, we**  
42 **estimate the minimum amount of land needed to secure known important sites**  
43 **for biodiversity, Earth's remaining wilderness, and the optimal locations for**  
44 **adequate representation of terrestrial species distributions and ecoregions. We**  
45 **discover that at least 64 million km<sup>2</sup> (43.6% of Earth's terrestrial area) requires**  
46 **conservation attention either through site-scale interventions (e.g. protected**  
47 **areas) or landscape-scale responses (e.g. land-use policies). Spatially explicit**  
48 **land-use scenarios show that 1.2 million km<sup>2</sup> of land requiring conservation**  
49 **attention is projected to be lost to intensive human land-use by 2030 and**  
50 **therefore requires immediate protection. Nations, local communities and**  
51 **industry are urged to implement the actions necessary to safeguard the land**  
52 **areas critical for conserving biodiversity.**

53 Conserving natural areas is crucial for safeguarding biodiversity and Earth system  
54 processes<sup>1</sup>, and is central to the Convention on Biological Diversity (CBD)'s 2050  
55 vision of sustaining a healthy planet and delivering benefits essential for all people<sup>2</sup>.  
56 The current CBD Aichi Target 11 aims to protect at least 17% of land area by 2020<sup>3</sup>,  
57 but this is widely seen as inadequate for halting biodiversity declines and averting the  
58 extinction crisis<sup>4-6</sup>. Post-2020 target discussions are now well underway<sup>7</sup>, and there is  
59 a broad consensus that the amount of land and sea being set aside for conservation  
60 attention must increase<sup>8</sup>. Recent calls are for targets to conserve anywhere from 26  
61 to 60% of land and ocean area by 2030 through site-scale responses such as  
62 protected areas and 'other effective area-based conservation measures' (OECMs)<sup>9-13</sup>.  
63 But there is increasing recognition that site-scale responses must be supplemented  
64 by broader landscape-scale actions aimed at halting vegetation destruction<sup>14</sup>. Global  
65 conservation targets are set by intergovernmental negotiation, but scientific input is  
66 essential to provide evidence about the location and amount of land necessary to  
67 conserve biodiversity.

68 Several broad scientific approaches exist that help provide evidence for global  
69 conservation, but when used in isolation, potentially provide conflicting or confusing  
70 evidence. For example, there are efficiency-based planning approaches that focus on  
71 maximising the number of species or ecosystems captured within a complementary  
72 set of conservation areas, prioritising species and ecosystems by their endemism,  
73 extinction risk, the degree to which they are represented (or underrepresented) in  
74 existing protected areas, or other criteria<sup>15,16</sup>. There are also site-based approaches  
75 such as the Key Biodiversity Area (KBA) initiative<sup>17</sup>, which aims to identify significant  
76 sites for biodiversity persistence using criteria including in relation to occurrence of  
77 threatened or geographically restricted species or ecosystems, intact ecological  
78 communities, or important biological processes (e.g. breeding aggregations)<sup>17</sup>. There  
79 are also proactive approaches that aim to conserve the last places that are free from  
80 human pressure, sometimes called 'wilderness areas'<sup>18</sup>, before they are eroded.  
81 These areas are increasingly recognised as essential for Earth system functioning<sup>19</sup>,  
82 sustaining long-term ecological and evolutionary processes<sup>20</sup> and long-term species  
83 persistence<sup>21</sup>, especially under climate change<sup>22</sup>. Examples include boreal forests  
84 which hold one-third of the world's terrestrial carbon and many wide-ranging  
85 species<sup>23,24</sup>, and the Amazon rainforest which needs to be maintained in its entirety,

86 not just its most species-rich areas, for it to sustain continent-scale hydrological  
87 patterns<sup>25</sup>.

88         Although all these approaches and initiatives are complementary and provide  
89 essential evidence needed to set biodiversity conservation targets, the adoption of any  
90 one of them as a unique guide for decision-making is likely to omit potentially critical  
91 elements of the CBD vision<sup>26</sup>. For example, a species-based focus on identifying areas  
92 in a way that most efficiently captures the most species would fail to recognise the  
93 Earth-system importance of the Boreal or Amazon forests, or the critical need to  
94 maintain large intact ecosystems globally for biodiversity<sup>21</sup>. Equally, a focus on  
95 proactively conserving Earth's intact ecosystems would fail to achieve representation  
96 of some of Earth's species or ecosystems<sup>27</sup>. Put simply, all approaches will lead to  
97 partly overlapping but often distinct science-based suggestions for area-based  
98 conservation<sup>28</sup>. Rather than debating the merits of any individual approach, we  
99 suggest that achieving the CBD vision requires a unified global strategy that  
100 comprehensively conserves species and ecosystems as well as Earth's remaining  
101 intact ecosystems, and we provide a methodological framework that utilises all three  
102 approaches.

103         Here, we identify the minimum land area requiring conservation attention  
104 globally. We start from the basis of existing protected areas (PAs), KBAs, and  
105 wilderness areas, and then efficiently add a large enough fraction of the ranges of  
106 28,594 species of mammals, birds, amphibians, reptiles, dragonflies and crustaceans  
107 to enable their persistence<sup>15,16,29</sup>, while also capturing representative samples of all  
108 terrestrial ecoregions<sup>30</sup>. We are not suggesting that all of this land should be  
109 designated as protected areas. Rather, we argue that it should be managed through  
110 a range of strategies for species and ecosystem conservation. For example, extensive  
111 areas that are remote and unlikely to be converted for human uses in the near-term  
112 could be safeguarded through effective sustainable land-use policies, while some  
113 locations may be best conserved through OECMs<sup>31</sup> rather than formal protected  
114 areas. We believe the appropriate governance and management regimes for any area  
115 depends in part on the likelihood of its habitat being converted to human uses<sup>32</sup> or  
116 degraded by human pressures<sup>33</sup>, and as such, the response for conserving the areas  
117 we identify will be context specific.

118 To highlight places that need immediate attention and potentially stronger forms  
119 of environmental governance, we further calculate which parts of the land needing  
120 conservation are most likely to suffer habitat conversion in the absence of  
121 conservation. We do this by using recent harmonised projections of future land-use  
122 change by 2030 and 2050<sup>34</sup>. To determine best- and worst-case scenarios, we  
123 evaluated projections under two different shared socioeconomic pathways (SSPs)<sup>35</sup>  
124 linked to representative concentration pathways (RCPs)<sup>36</sup>: an optimistic scenario  
125 where the world gradually moves towards a more sustainable future, SSP1 (RCP2.6;  
126 IMAGE model), and a pessimistic scenario where regional rivalries dominate  
127 international relations and land-use change is poorly regulated, SSP3 (RCP7.0; AIM  
128 model). The areas we identify as at risk of habitat loss represent urgent priorities for  
129 conservation action through site- and landscape-scale responses.

### 130 **The minimum land area requiring conservation**

131 We estimate that, in total, the minimum land area that must be effectively conserved  
132 covers 64 million km<sup>2</sup> (43.6% of Earth's terrestrial area; Figure 1). This consists of 35  
133 million km<sup>2</sup> of wilderness, 21 million km<sup>2</sup> of existing PAs, 11 million km<sup>2</sup> of KBAs, and  
134 13 million km<sup>2</sup> (9% of Earth's terrestrial area) of additional land needed to promote  
135 species persistence based on conserving minimum proportions of their ranges (Figure  
136 2). We find 1.9 million km<sup>2</sup> of overlap between PAs, KBAs and wilderness, amounting  
137 to a relatively small 5% of wilderness extent, 9% of PA extent, and 18% of KBA extent.

138 There is considerable variation geographically in the amount of land requiring  
139 effective conservation. We find that 60.6% of land in North America needs to be  
140 conserved, primarily due to the wilderness areas of Canada and the USA and  
141 extensive additional land areas in Central America. In contrast, only 32.3% of Europe's  
142 land area requires conservation. The proportion of land requiring conservation also  
143 varies considerably among nations (Figure 3), with notably high values in Canada  
144 (79%), Costa Rica (83%), Suriname (84%), and Ecuador (81%), where these tropical-  
145 country figures reflect high numbers of endemic species and, in Ecuador's case, a  
146 large overlap with the remaining Amazon forest (Extended Data Table 1). We also find  
147 that a larger proportion of land in developed countries (53%) requires effective  
148 conservation compared to emerging economies (47%) or developing countries (34%)  
149 (Extended Data Table 2). Many island nations have high proportions of land requiring

150 conservation (Figure 3; Supplementary Table 1), but this is likely an artefact of the  
151 necessarily coarse resolution (30x30 km) of the analysis, where a few grid cells can  
152 encompass an entire small island.

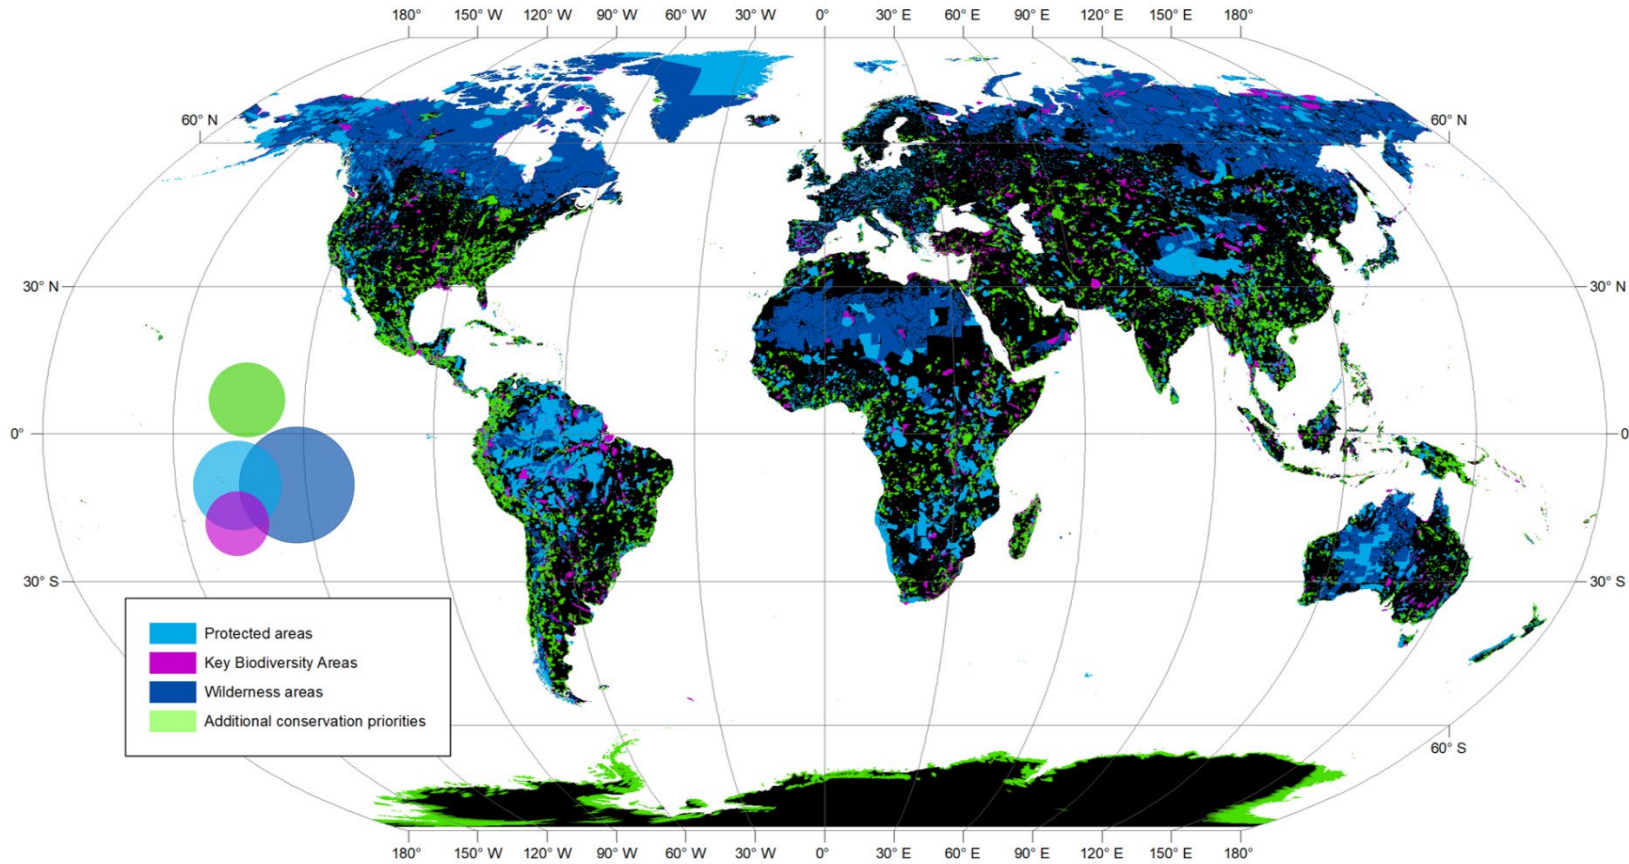

155 **Figure 1. The minimum land area for conserving terrestrial biodiversity.** The components include protected areas (light blue),  
 156 Key Biodiversity Areas (purple) and wilderness areas (dark blue). Where they overlap, protected areas are shown above Key  
 157 Biodiversity Areas, which are shown above wilderness areas. New conservation priorities are in green. The Venn diagram shows the  
 158 proportional overlap between features.



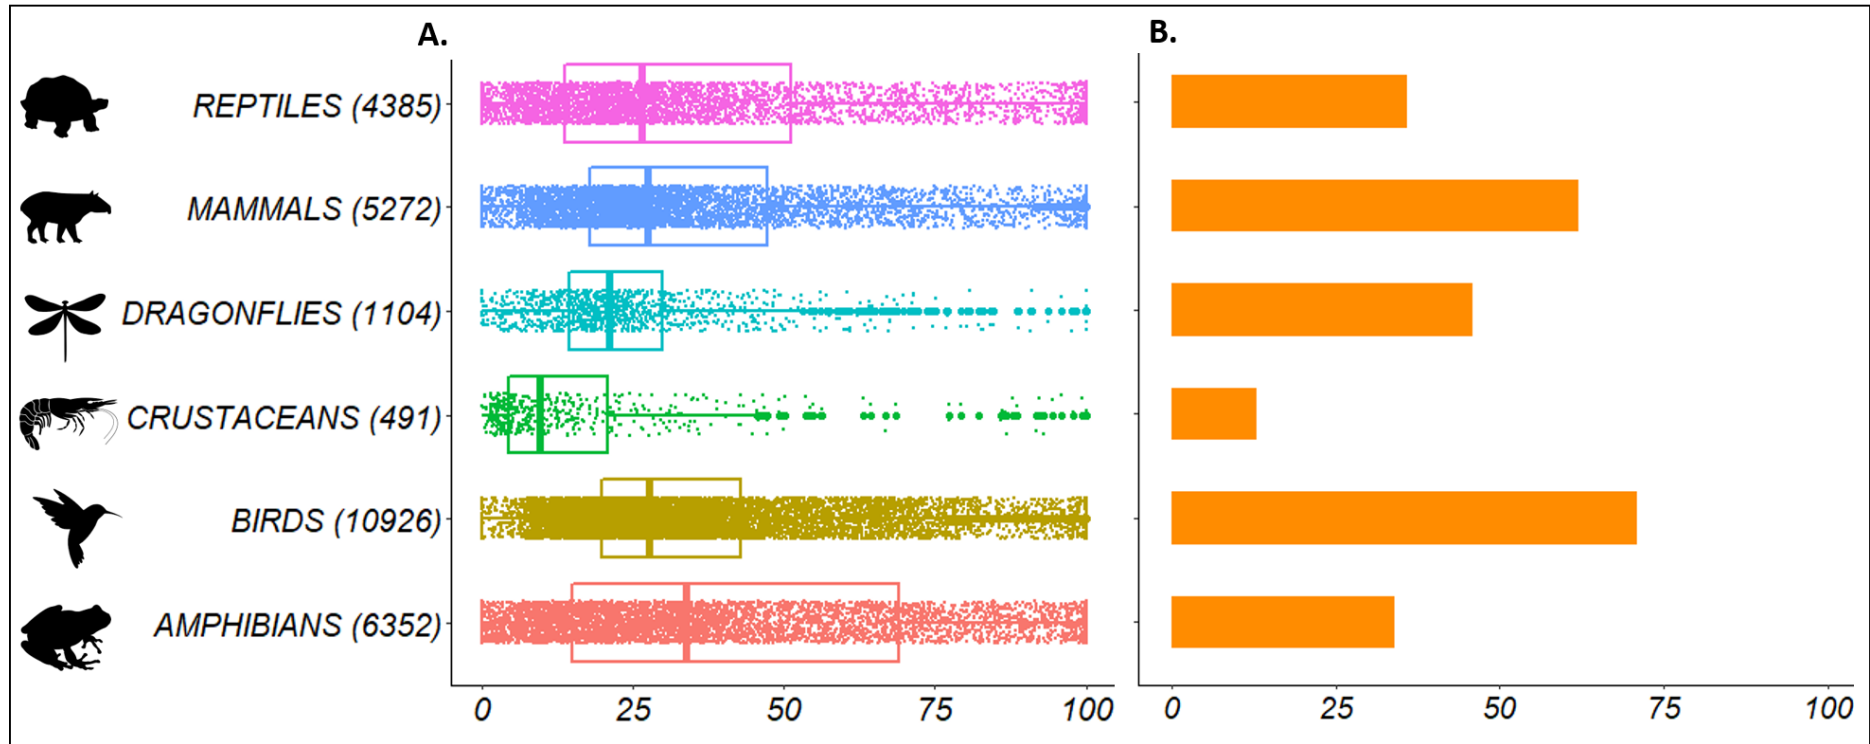

160

161 **Figure 2. Gap analyses of species coverage within areas of conservation importance.** A) The percentage of each species'  
 162 distribution overlapping with areas of conservation importance (protected areas, Key Biodiversity Areas, and wilderness areas).  
 163 Boxplots show the median and 25<sup>th</sup> and 75<sup>th</sup> percentiles for each taxonomic group. B) the percentage of species with enough of  
 164 their distribution overlapping existing conservation areas to meet their species-specific coverage target (orange).

165 **Future risk of land conversion in areas requiring conservation**

166 Our results suggest that under the pessimistic scenario SSP3, 1.2 million km<sup>2</sup> (2%) of  
167 the total land area requiring effective conservation will have its habitat converted to  
168 human uses by 2030, increasing to 2.1 million km<sup>2</sup> (3.4%) by 2050 (Figure 4). Habitat  
169 conversion varies across continents and countries; Africa is projected to have the  
170 highest proportion of important conservation land converted by 2030 (>760,000 km<sup>2</sup>,  
171 6.3%), increasing to 1.4 million km<sup>2</sup> (11.1%) by 2050 (Extended Data Table 3). The  
172 lowest risk of conversion is in Oceania and North America. Substantially larger  
173 proportions of land requiring conservation in developing countries are projected to  
174 have their habitat converted by 2030 (4.3%), compared to emerging economies (1.3%)  
175 or developed countries (0.8%).

176         Based on SSP1, representing a world acting on sustainability, we estimate that  
177 130,000 km<sup>2</sup> (0.1%) of the land requiring effective conservation may suffer natural  
178 habitat conversion by 2030, increasing to 3.8 million km<sup>2</sup> (0.5%) by 2050. This  
179 highlights that our results are sensitive to future societal development pathways, but  
180 even under the most optimistic scenario (SSP1), large extents of important  
181 conservation land are at risk of having natural habitat converted to more intensive  
182 human land-uses. We find very similar geographical patterns of risk under SSP1 as  
183 those highlighted for SSP3.

184

185

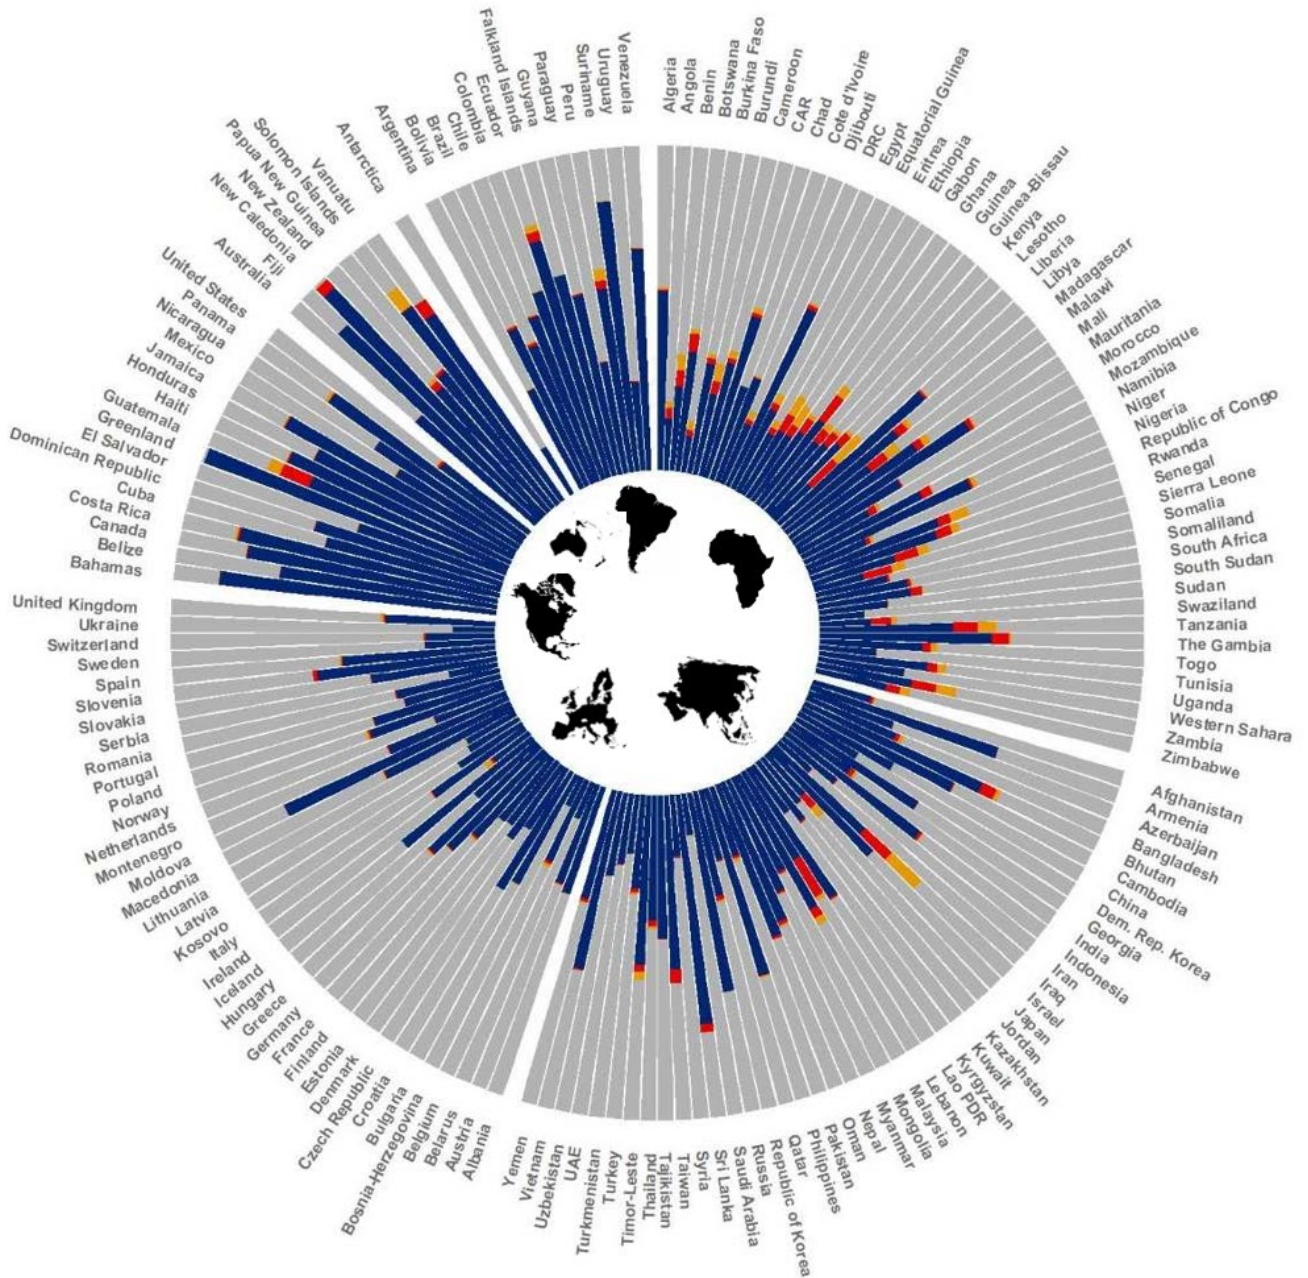

186

187 **Figure 3. National level land area for conservation and projected habitat loss.**

188 Estimated proportion of each country requiring effective conservation attention that is  
189 projected to suffer habitat conversion by 2030 (red), 2050 (orange) or that are  
190 projected not to be converted (blue). Grey areas are outside the land identified for  
191 conservation. Countries with a land area < 10,000 km<sup>2</sup> were excluded from the  
192 figure.

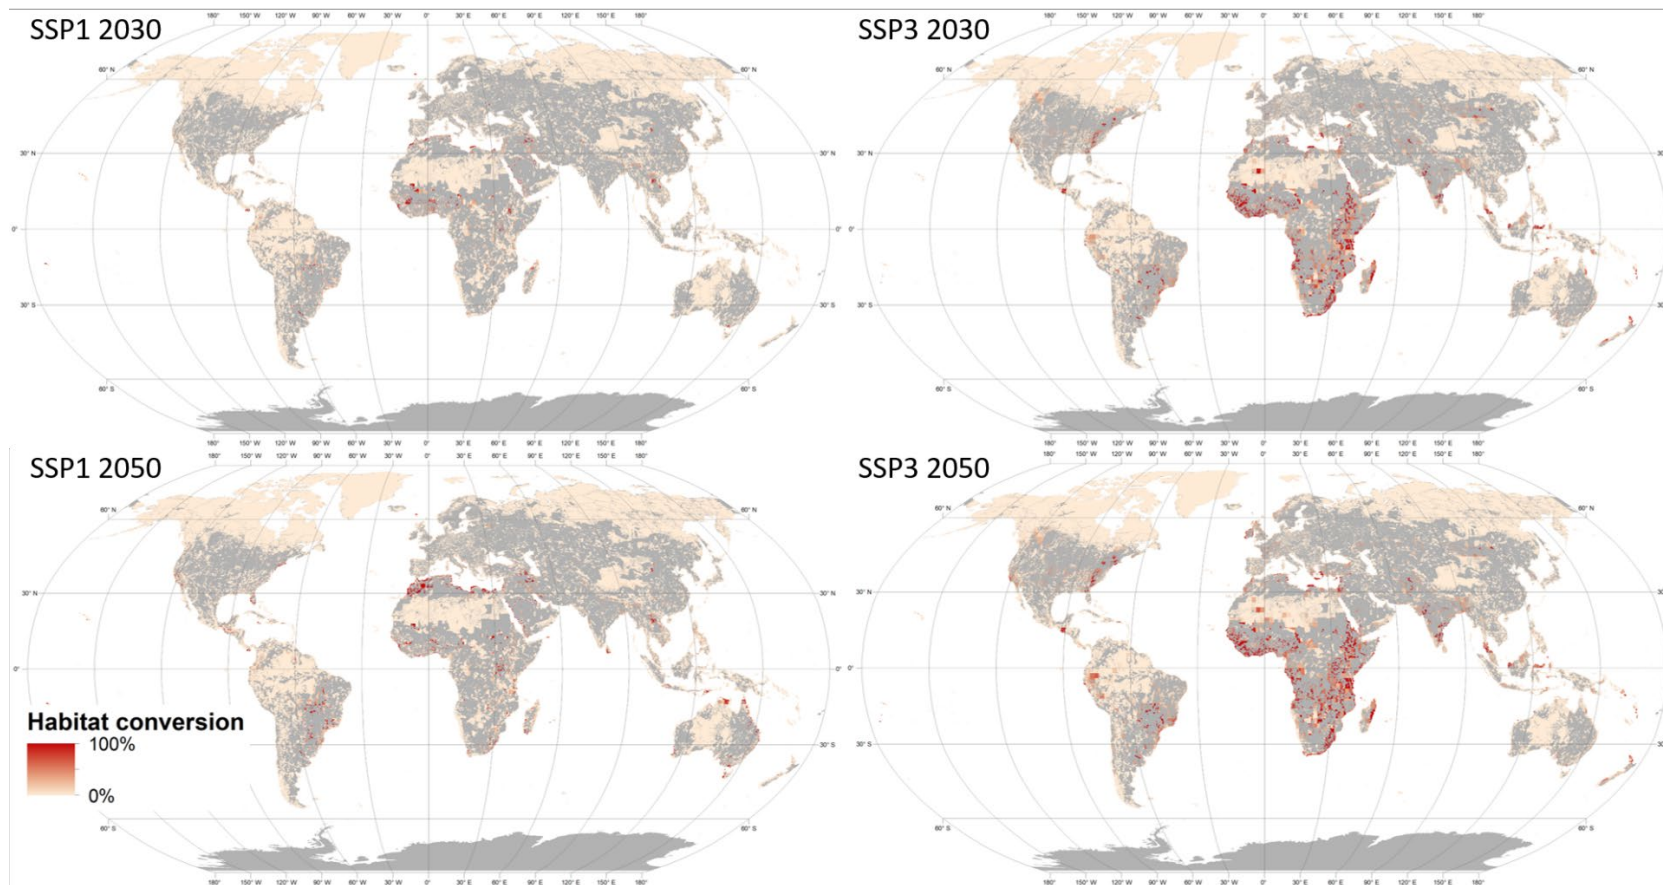

193

194 **Figure 4. Future habitat conversion on important conservation land.** The location of land requiring effective conservation  
 195 attention and the proportion of natural habitat projected to be converted to human uses by 2030 and 2050 based on Shared  
 196 Socioeconomic Pathway 1 (SSP1; an optimistic scenario) and Shared Socioeconomic Pathway 3 (SSP3; a pessimistic scenario).  
 197 Grey areas are not identified as existing conservation areas or additional conservation priorities. The data on future land use does  
 198 not extend to Antarctica.

## 199 **Implications for global policy**

200 Our analyses represent the most comprehensive estimate of the minimum land area  
201 requiring effective conservation attention in order to safeguard species and  
202 ecosystems while accounting for current protected areas and areas of recognised  
203 biodiversity importance (KBAs and Earth's remaining intact ecosystems). Given our  
204 inclusion of wilderness areas and also updated maps of KBAs, our estimate that 43.6%  
205 of land requires effective conservation is, unsurprisingly, larger than those from  
206 previous analyses that have focussed primarily on species and/or ecosystems, or used  
207 earlier KBA datasets (e.g. 27.9% Butchart, et al. <sup>16</sup>, 20.2% Venter, et al. <sup>15</sup>, and 30%  
208 Larsen, et al. <sup>4</sup>). Effectively conserving the land areas we identify would make a  
209 substantial contribution towards achieving a suite of targets under the Convention for  
210 Biological Diversity, including halting the extinction and decline of species (the focus  
211 of CBD Aichi Target 12), protecting areas of particular importance for biodiversity  
212 (Aichi Target 11), representing all native ecosystem types (Aichi Target 11), halting  
213 the loss of natural habitats (Aichi Target 5) and securing areas that maintain ecological  
214 and evolutionary processes<sup>3</sup>.

215 Encouraging nations to adopt a more ambitious conservation agenda within the  
216 post-2020 biodiversity framework, and to scale up the proportion of land that is  
217 effectively conserved, will be challenging. However, much (70%) of the land we identify  
218 for conservation attention is still relatively intact, and therefore does not require costly  
219 conservation interventions (such as vegetation restoration activities) beyond retention  
220 policies that ensure these places remain intact<sup>37</sup>. But at least 1.2 million km<sup>2</sup> of land  
221 needing conservation - an area larger than South Africa representing 0.9% of Earth's  
222 terrestrial surface - is both important for achieving our outlined conservation objectives  
223 and likely to have its habitat converted to human uses by 2030. A tactical target aimed  
224 at immediately safeguarding these at-risk places would make a significant contribution  
225 towards addressing the biodiversity crisis, but only if combined with parallel efforts  
226 ensuring that habitat conversion is not displaced into other important conservation  
227 areas<sup>38,39</sup>.

228 A diverse array of actions is required to achieve the scale of conservation  
229 necessary to deliver positive conservation outcomes. These actions include ensuring  
230 that the protected area estate is significantly expanded and managed more effectively

231 to benefit biodiversity<sup>12</sup>, formally recognising and expanding other effective area-  
232 based conservation measures, and implementing broad-scale responses aimed at  
233 limiting core threatening processes such as habitat conversion. Another strategy that  
234 may effectively limit the expansion of human pressures is to recognise Indigenous  
235 Peoples' rights to land, benefit sharing, and institutions, so they can effectively  
236 conserve their own lands, as there is substantial global overlap between Indigenous  
237 lands and the important conservation land we identified<sup>40</sup>. On all identified  
238 conservation land, regardless of its immediate risk, the expansion of roads and  
239 developments such as agriculture, forestry, and mining, need to be very carefully  
240 managed to avoid net damage to ecosystems<sup>41</sup>. As such, mechanisms that direct  
241 developments away from important conservation areas are also crucial, including  
242 strengthening investment and performance standards (e.g. for financial organisations  
243 such as the World Bank and other development investors<sup>42</sup>), and tightening existing  
244 industry certification standards.

245 A critical implementation challenge is that the proportion of land different  
246 countries would need to conserve is highly inequitable. In responding to this inequity,  
247 the conservation community could learn from how nations are addressing climate  
248 change. For example, under the United Nations Framework Convention on Climate  
249 Change, nations responsible for high levels of emissions of greenhouse gases are  
250 obliged to make larger emission reductions<sup>43</sup>, following the concept of common but  
251 differentiated responsibilities that is foundational to all global environmental agendas  
252 including the CBD<sup>44</sup>. Since the burden of conservation is disproportionately distributed,  
253 cost-sharing and fiscal transfer mechanisms are likely necessary to ensure that all  
254 national participation is equitable and fair, and the opportunity costs of foregone  
255 developments are considered<sup>45,46</sup>. This is particularly important since the majority of  
256 land requiring conservation attention and at risk of immediate habitat conversion is  
257 found in developing nations.

258 Our estimate of the land area requiring effective biodiversity conservation must  
259 be considered the bare minimum needed, and will almost certainly expand as more  
260 data on the distributions of underrepresented species such as plants, invertebrates,  
261 and freshwater species becomes available for future analyses<sup>47</sup>. New KBAs will also  
262 continue to be identified for under-represented taxonomic groups, threatened or  
263 geographically-restricted ecosystems, and highly intact and irreplaceable ecosystems.

264 Species and ecosystems are also shifting under climate change, and as a result, are  
265 leading to changes in the location of land requiring effective conservation<sup>48</sup>, which we  
266 could not account for. We also note that post-2020 biodiversity targets are likely to  
267 require higher levels of ecoregional representation than the 17% we used (see  
268 Methods). Finally, more land beyond the areas we identify will need to be conserved  
269 for non-biodiversity conservation purposes, such as nature-based solutions to climate  
270 change<sup>8</sup>.

271 For the above reasons, our results do not imply that the land our analysis did  
272 not identify, the other 56.4% of Earth's land surface, is unimportant for conservation  
273 and global sustainable development goals. Much of this area will be important for  
274 sustaining the provision of ecosystem services to people, from climate regulation to  
275 provisioning of food, materials, drinking water, and crop pollination, in addition to  
276 supporting other elements of biodiversity not captured in our priority areas<sup>8</sup>.  
277 Furthermore, many human activities can impact the entire Earth system regardless of  
278 where they occur (e.g. fossil fuel use, pesticide use, and pollution), so management  
279 efforts focussed on limiting the ultimate drivers of biodiversity loss are essential<sup>49</sup>.  
280 Finally, we have not considered how constraining developments to locations outside  
281 of the land area needing conservation impacts solutions for meeting human needs,  
282 such as increasing energy and food demands. Leakage of more intense land use  
283 impacts into non-conservation priority areas must be carefully managed<sup>38</sup>. Although  
284 social objectives that lead to the betterment of all humanity are clearly important, they  
285 cannot be all achieved sustainably without limiting the degradation of the ecosystems  
286 supporting all life<sup>1</sup>. Integrated assessments of how we can achieve multiple social  
287 objectives while effectively conserving biodiversity at a global scale are important  
288 avenues for future research<sup>50</sup>.

289 The world's nations are already discussing new post-2020 biodiversity  
290 conservation targets within the CBD and wider Sustainable Development Goals  
291 international agenda. These targets will define the global conservation agenda for at  
292 least the next decade, so it is crucial that they are adequate to achieve biodiversity  
293 outcomes<sup>12</sup>. Our analyses show that a minimum of 43.6% of land requires effective  
294 conservation attention, through both site- and landscape-scale approaches, which  
295 should serve as an ecological foundation for negotiations. If signatory nations are  
296 serious about safeguarding the biodiversity and ecosystem services that underpin all

297 life on earth<sup>1,50</sup>, then they need to recognise that conservation action must be  
298 immediately and substantially scaled-up, in extent, intensity, and effectiveness.



## 299 **Methods**

### 300 **Mapping important conservation areas**

301 We obtained spatial data on the location of 214,921 PAs from the January 2017  
302 version of the World Database on Protected Areas (WDPA)<sup>51</sup>. This edition still contains  
303 data on PAs in China, which have largely been removed from the publicly accessible  
304 WDPA in more recent versions. We handled the WDPA data according to best-  
305 practice guidelines that are available on the protected planet website  
306 (<https://www.protectedplanet.net/c/calculating-protected-area-coverage>) and included  
307 regionally, nationally and internationally designated PAs. The WDPA dataset contains  
308 PAs represented as point data. In these cases, we converted the points to polygons  
309 by setting a geodesic buffer around the point based on the areal attributes of that point.  
310 We excluded points with no areal attributes. We also excluded all marine PAs,  
311 'proposed' PAs, and UNESCO Man and Biosphere Reserves since their core  
312 conservation areas often overlap with other PAs and their buffer zones' primary goals  
313 are not biodiversity conservation. Finally, we flattened (i.e. dissolved) the PA data to  
314 remove any overlapping PAs.

315 We obtained data on the boundaries of 14,192 KBAs from the January 2017  
316 version of the World Database of Key Biodiversity Areas<sup>52</sup>. KBAs documented with  
317 point data were treated as outlined above for PAs. We obtained global data on  
318 wilderness extent from Allan, et al. <sup>53</sup>, utilising maps of 'pressure-free lands'. We  
319 merged PAs, KBAs and wilderness areas together, removing overlaps (i.e. again  
320 flattened the merged datasets) to create a global template of "existing important  
321 conservation areas".

### 322 **Distribution and representation of biodiversity**

323 We obtained data on the distributions of terrestrial mammals (n=5,272), amphibians  
324 (n=6,352), reptiles (including marine turtles; n=4,385), freshwater crayfish (n=491) and  
325 dragonflies and damselflies (order Odonata; n=1,104) from the IUCN Red List of  
326 Threatened Species<sup>54</sup>. Bird distribution data (n=10,926) were sourced from BirdLife  
327 International and Handbook of the Birds of the World<sup>55</sup>. These represent the most  
328 comprehensive spatial databases for these taxonomic groups, although crayfish,  
329 Odonata, and reptiles are likely still undersampled. We also included data on the

330 distribution of terrestrial ecoregions<sup>30</sup>, which are bio-geographically distinct spatial  
331 units at the global scale.

332 We set representation targets for the percentage of each species' distribution  
333 that should be effectively conserved, following previous studies (Rodrigues, et al. <sup>29</sup>,  
334 Venter, et al. <sup>15</sup>, and Butchart, et al. <sup>16</sup>). Targets were set as a function of a species'  
335 range size, and were log-linearly scaled between 10% for species with distributions  
336 >250,000km<sup>2</sup>, to 100% for species with ranges <1,000km<sup>2</sup>. We limited the target for  
337 species with large ranges to 1 million km<sup>2</sup> maximum<sup>16</sup>. For each ecoregion we  
338 followed<sup>15</sup> by setting a coverage target of 17%, in line with Aichi Target 11 of the  
339 Strategic Plan for Biodiversity<sup>3</sup>. We acknowledge that Aichi Target 11 expires in 2020,  
340 and that other target setting approaches are being developed, such as those based  
341 on species persistence<sup>56</sup>, but these are currently unpublished (and the nature of post-  
342 2020 targets is still under discussion) so we chose to proceed with the widely accepted  
343 method developed by Rodrigues, et al. <sup>29</sup>. We carried out a "gap analysis" by  
344 calculating the proportion of each species' range that currently overlaps with the  
345 important conservation areas, and comparing this with each species' coverage target  
346 to identify under-represented species and the extent of additional range each requires.

### 347 **Priority areas for the expansion of conservation efforts**

348 We used integer linear programming to identify spatial priorities for meeting species  
349 conservation targets, whilst accounting for current protection within existing important  
350 conservation areas, and minimizing the cost (human footprint<sup>57</sup>) of the areas selected  
351 (the minimum set problem)<sup>58</sup>. We used Gurobi software (version 5.6.2) to run the  
352 spatial prioritisation, following methods developed by Beyer, et al. <sup>59</sup> that account for  
353 multi-species complementarity. Integer linear programming can reach optimal  
354 solutions to conservation problems if unrestricted by computing time. We applied a  
355 threshold specifying that solutions must be within 0.5% of the optimum<sup>59</sup>, which returns  
356 a near-optimal solution and greatly reduces processing time.

357 To run the analysis, we first created a 30 x 30 km (900 km<sup>2</sup>) global planning  
358 unit grid. This resolution limits the risk of commission errors when working with the  
359 available species distribution data (e.g. assuming a species is present when it is  
360 not)<sup>16,60</sup>. Planning units were clipped to terrestrial areas and inland lakes and  
361 waterways so that freshwater taxa could be included. We included Antarctica and

362 Greenland. We calculated the area of each conservation feature (e.g. species  
363 distribution and ecoregion distribution) within each planning unit, including the area  
364 within existing important conservation areas. All geospatial data processing was  
365 carried out in the Mollweide equal-area projection using a spatially enabled  
366 PostgreSQL database (using PostGIS version 2.2) or in ESRI ArcGIS version 10.5.1.

367 We used the sum of the human footprint<sup>57</sup> as a surrogate for the cost of  
368 conservation in each planning unit. The human footprint is a map of cumulative human  
369 pressure on the natural environment for the year 2009 at a 1km<sup>2</sup> resolution globally.  
370 We assumed that conservation will be cheaper and more feasible in areas with less  
371 human influence, and that places classified as 'built areas' are unavailable for  
372 conservation. By built areas we mean cities and major urban centres that contain no  
373 original habitat. Planning units beyond the extent of the human footprint (e.g. ice-free  
374 regions of Antarctica and remote sub-Antarctic islands) were set a cost of zero.

375 We repeated the entire prioritisation analysis with two additional planning unit  
376 grids. These grids were still 30 x 30 km in scale but the cells were shifted 10km East  
377 and North of the original grid, and 10km South and West of the original grid. This limits  
378 uncertainty associated with the placement of the grid, and to the best of our  
379 knowledge, our analysis is the first to use such an approach. Areal statistics reported  
380 in the methods are based on the original grid, whilst on the maps all three grids are  
381 presented simultaneously with a degree of transparency so that priority areas selected  
382 in all three analyses are highlighted. This approach also ensures a degree of fuzziness  
383 in the priority area boundaries in the maps, demonstrating to decision makers that,  
384 while scale and location of planning units will introduce subtle differences in any  
385 prioritization scenario, certain areas always stand-out as conservation priorities.

## 386 **Future threats to conservation areas**

387 To map the risk of habitat conversion occurring in the conservation areas identified,  
388 we utilised spatially explicit data on future land-use scenarios from the newly released  
389 Land Use Harmonisation Dataset v2 (<http://luh.umd.edu/>)<sup>34</sup>. To determine best- and  
390 worst-case scenarios, we evaluated projections under two different Shared  
391 Socioeconomic Pathways (SSPs)<sup>35</sup>, which are linked to Representative Concentration  
392 Pathways (RCPs)<sup>36</sup>: specifically, SSP1 (RCP2.6; IMAGE), an optimistic scenario

393 where the world gradually moves towards a more sustainable future, and SSP3  
394 (RCP7.0; AIM), a pessimistic scenario where land use change is poorly regulated.

395 The harmonised land-use data contains 12 state layers (with the unit being the  
396 fraction of a grid cell in that state) for the years 2015 (current baseline), 2030 and  
397 2050. We considered four of the state layers as natural land-cover classes, including;  
398 primary forested land, primary non-forested land, potentially forested secondary land,  
399 and potentially non-forested secondary land. Using these four classes, we calculated  
400 the proportion of natural land projected to be lost (converted to human uses) by the  
401 years 2030 and 2050 in each 30 x 30 km grid cell. From this we calculated the area of  
402 natural land projected to be lost within each grid cell. We assume that once land is  
403 converted it remains converted. Antarctica and remote islands were excluded from this  
404 part of the analyses because the land-use data does not extend to them.

405

## 406 References

- 407 1 IPBES. Summary for policymakers of the global assessment report on biodiversity and  
408 ecosystem services of the Intergovernmental Science-Policy Platform and Biodiversity and  
409 Ecosystem Services. (IPBES secretariat, Bonn, Germany, 2019).
- 410 2 CBD. Conference of the Parties to the Convention on Biological Diversity: Long-term strategic  
411 directions to the 2050 vision for biodiversity, approaches to living in harmony with nature  
412 and preparation for the post-2020 global biodiversity framework. *CBD/COP/14/9* (2018).
- 413 3 CBD. *Conference of the parties decision X/2 Strategic Plan for Biodiversity 2011 - 2020*,  
414 2011).
- 415 4 Larsen, F. W., Turner, W. R. & Mittermeier, R. A. Will protection of 17% of land by 2020 be  
416 enough to safeguard biodiversity and critical ecosystem services? *Oryx* **49**, 74-79,  
417 doi:10.1017/S0030605313001348 (2014).
- 418 5 Di Marco, M., E.M., W. J., Oscar, V. & P., P. H. Global Biodiversity Targets Require Both  
419 Sufficiency and Efficiency. *Conservation Letters* **9**, 395-397, doi:doi:10.1111/conl.12299  
420 (2016).
- 421 6 O'Leary, B. *et al.* Effective Coverage Targets for Ocean Protection. *Conservation Letters* **9**,  
422 398-404, doi:doi:10.1111/conl.12247 (2016).
- 423 7 CBD. *Twenty-third meeting of the Subsidiary Body on Scientific, Technical and Technological*  
424 *Advice. 25-29 November 2019. Montreal, Canada*, <[https://www.cbd.int/meetings/SBSTTA-](https://www.cbd.int/meetings/SBSTTA-23)  
425 [23](https://www.cbd.int/meetings/SBSTTA-23)> (2019).
- 426 8 Maron, M., Simmonds, J. S. & Watson, J. E. M. Bold nature retention targets are essential for  
427 the global environment agenda. *Nature Ecology & Evolution* **2**, 1194-1195,  
428 doi:10.1038/s41559-018-0595-2 (2018).
- 429 9 Pimm, S. L., Jenkins, C. N. & Li, B. V. How to protect half of Earth to ensure it protects  
430 sufficient biodiversity. *Science Advances* **4**, doi:10.1126/sciadv.aat2616 (2018).
- 431 10 Baillie, J. & Zhang, Y.-P. Space for nature. *Science* **361**, 1051-1051,  
432 doi:10.1126/science.aau1397 (2018).
- 433 11 Dinerstein, E. *et al.* A Global Deal For Nature: Guiding principles, milestones, and targets.  
434 *Science Advances* **5**, eaaw2869, doi:10.1126/sciadv.aaw2869 (2019).
- 435 12 Visconti, P. *et al.* Protected area targets post-2020. *Science* **364**, 239-241,  
436 doi:10.1126/science.aav6886 (2019).
- 437 13 Jones, K. R. *et al.* Area requirements to safeguard Earth's marine species. *bioRxiv*, 808790,  
438 doi:10.1101/808790 (2019).
- 439 14 Boyd, C. *et al.* Spatial scale and the conservation of threatened species. *Conservation Letters*  
440 **1**, 37-43, doi:10.1111/j.1755-263X.2008.00002.x (2008).
- 441 15 Venter, O. *et al.* Targeting Global Protected Area Expansion for Imperiled Biodiversity. *PLOS*  
442 *Biology* **12**, e1001891, doi:10.1371/journal.pbio.1001891 (2014).
- 443 16 Butchart, S. H. M. *et al.* Shortfalls and Solutions for Meeting National and Global  
444 Conservation Area Targets. *Conservation Letters* **8**, 329-337, doi:10.1111/conl.12158 (2015).
- 445 17 IUCN. A Global Standard for the Identification of Key Biodiversity Areas. (Gland, Switzerland:  
446 IUCN, 2016).
- 447 18 Watson, J. E. M. *et al.* Protect the last of the wild. *Nature* **536**, 27 - 30 (2018).
- 448 19 Salati, E., Dall'Olio, A., Matsui, E. & Gat, J. E. Recycling of water in the Amazon Basin: an  
449 isotopic study. *Water Resources Research* **15**, 1250-1258 (1979).
- 450 20 Soule, M. E. *et al.* The role of connectivity in Australian conservation. *Pacific Conservation*  
451 *Biology* **10**, 266-279, doi:<https://doi.org/10.1071/PC040266> (2004).
- 452 21 Di Marco, M., Ferrier, S., Harwood, T. D., Hoskins, A. J. & Watson, J. E. M. Wilderness areas  
453 halve the extinction risk of terrestrial biodiversity. *Nature*, doi:10.1038/s41586-019-1567-7  
454 (2019).

- 455 22 Mantyka-Pringle, C. S. *et al.* Climate change modifies risk of global biodiversity loss due to  
456 land-cover change. *Biological Conservation* **187**, 103-111, doi:10.1016/j.biocon.2015.04.016  
457 (2015).
- 458 23 Pan, Y. *et al.* A Large and Persistent Carbon Sink in the World's Forests. *Science* **333**, 988-  
459 993, doi:10.1126/science.1201609 (2011).
- 460 24 Lamb, C. T., Festa-Bianchet, M. & Boyce, M. S. Invest long term in Canada's wilderness.  
461 *Science* **359**, 1002-1002, doi:10.1126/science.aat1104 (2018).
- 462 25 Sampaio, G. *et al.* Regional climate change over eastern Amazonia caused by pasture and  
463 soybean cropland expansion. *Geophysical Research Letters* **34**, L17709,  
464 doi:10.1029/2007gl030612 (2007).
- 465 26 Smith, R. J. *et al.* Synergies between the key biodiversity area and systematic conservation  
466 planning approaches. *Conservation Letters* **12**, e12625, doi:doi:10.1111/conl.12625 (2019).
- 467 27 Watson, J. E. M. *et al.* Catastrophic declines in wilderness areas undermine global  
468 environmental targets. *Current Biology* (2016).
- 469 28 Kullberg, P., Di Minin, E. & Moilanen, A. Using key biodiversity areas to guide effective  
470 expansion of the global protected area network. *Global Ecology and Conservation* **20**,  
471 e00768, doi:<https://doi.org/10.1016/j.gecco.2019.e00768> (2019).
- 472 29 Rodrigues, A. S. L. *et al.* Effectiveness of the global protected area network in representing  
473 species diversity. *Nature* **428**, 640-643,  
474 doi:[http://www.nature.com/nature/journal/v428/n6983/supinfo/nature02422\\_S1.html](http://www.nature.com/nature/journal/v428/n6983/supinfo/nature02422_S1.html)  
475 (2004).
- 476 30 Olson, D. N. *et al.* Terrestrial ecoregions of the world: a new map of life on Earth. *BioScience*  
477 **51**, 933 - 938 (2001).
- 478 31 Donald, P. F. *et al.* The prevalence, characteristics and effectiveness of Aichi Target 11's  
479 "other effective area-based conservation measures" (OECMs) in Key Biodiversity Areas.  
480 *Conservation Letters* **0**, e12659, doi:10.1111/conl.12659 (2019).
- 481 32 Sacre, E., Bode, M., Weeks, R. & Pressey, R. L. The context dependence of frontier versus  
482 wilderness conservation priorities. *Conservation Letters* **12**, e12632, doi:10.1111/conl.12632  
483 (2019).
- 484 33 Allan, J. R. *et al.* Hotspots of human impact on threatened terrestrial vertebrates. *PLOS*  
485 *Biology* **17**, e3000158, doi:10.1371/journal.pbio.3000158 (2019).
- 486 34 Hurtt, G., Chini, L., Sahajpal, R. & Frohling, S. *Harmonization of global land-use change and*  
487 *management for the period 850-2100*, <<http://luh.umd.edu/>> (2016).
- 488 35 O'Neill, B. C. *et al.* The roads ahead: Narratives for shared socioeconomic pathways  
489 describing world futures in the 21st century. *Global Environmental Change* **42**, 169-180,  
490 doi:<https://doi.org/10.1016/j.gloenvcha.2015.01.004> (2017).
- 491 36 van Vuuren, D. P. *et al.* The representative concentration pathways: an overview. *Climatic*  
492 *Change* **109**, 5, doi:10.1007/s10584-011-0148-z (2011).
- 493 37 Watson, J. E. M. *et al.* The exceptional value of intact forest ecosystems. *Nature Ecology &*  
494 *Evolution*, doi:10.1038/s41559-018-0490-x (2018).
- 495 38 Renwick, A. R., Bode, M. & Venter, O. Reserves in Context: Planning for Leakage from  
496 Protected Areas. *PLOS ONE* **10**, e0129441, doi:10.1371/journal.pone.0129441 (2015).
- 497 39 Visconti, P., Bakkenes, M., Smith Robert, J., Joppa, L. & Sykes Rachel, E. Socio-economic and  
498 ecological impacts of global protected area expansion plans. *Philosophical Transactions of*  
499 *the Royal Society B: Biological Sciences* **370**, 20140284, doi:10.1098/rstb.2014.0284 (2015).
- 500 40 Garnett, S. T. *et al.* A spatial overview of the global importance of Indigenous lands for  
501 conservation. *Nature Sustainability* **1**, 369-374, doi:10.1038/s41893-018-0100-6 (2018).
- 502 41 Arlidge, W. N. S. *et al.* A Global Mitigation Hierarchy for Nature Conservation. *BioScience* **68**,  
503 336-347, doi:10.1093/biosci/biy029 (2018).
- 504 42 IFC. International Finance Corporation. Performance Standard 6. Biodiversity and  
505 Sustainable Management of Living Natural Resources. (2012).

- 506 43 United Nations. Paris Agreement (United Nations). December 2015., (2015).
- 507 44 United Nations. Report of the United Nations Conference on Environment and Development.  
508 Rio Declaration on Environment and Development. *A/CONF.151/26 Vol. I* (1992).
- 509 45 Armstrong, C. Sharing conservation burdens fairly. *Conservation Biology* **33**, 554-560,  
510 doi:10.1111/cobi.13260 (2019).
- 511 46 Allan, J. R. *et al.* Navigating the complexities of coordinated conservation along the river  
512 Nile. *Science Advances* **5**, eaau7668, doi:10.1126/sciadv.aau7668 (2019).
- 513 47 Di Marco, M. *et al.* Projecting impacts of global climate and land-use scenarios on plant  
514 biodiversity using compositional-turnover modelling. *Global Change Biology* **25**, 2763-2778,  
515 doi:10.1111/gcb.14663 (2019).
- 516 48 Ponce-Reyes, R. *et al.* Forecasting ecosystem responses to climate change across Africa's  
517 Albertine Rift. *Biological Conservation* **209**, 464-472,  
518 doi:<https://doi.org/10.1016/j.biocon.2017.03.015> (2017).
- 519 49 Büscher, B. *et al.* Half-Earth or Whole Earth? Radical ideas for conservation, and their  
520 implications. *Oryx* **51**, 407-410, doi:10.1017/S0030605316001228 (2016).
- 521 50 Tallis, H. M. *et al.* An attainable global vision for conservation and human well-being.  
522 *Frontiers in Ecology and the Environment* **16**, 563-570, doi:10.1002/fee.1965 (2018).
- 523 51 IUCN and UNEP-WCMC. *World Database on Protected Areas (WDPA)*,  
524 <[www.protectedplanet.net](http://www.protectedplanet.net)> (2017).
- 525 52 Birdlife International. *World Database of Key Biodiversity Areas (KBAs)*. Developed by the  
526 KBA Partnership., <[www.keybiodiversityareas.org](http://www.keybiodiversityareas.org)> (2017).
- 527 53 Allan, J. R., Venter, O. & Watson, J. E. M. Temporally inter-comparable maps of terrestrial  
528 wilderness and the Last of the Wild. *Scientific Data* **4**, 170187, doi:10.1038/sdata.2017.187  
529 (2017).
- 530 54 IUCN. *The IUCN Red List of Threatened Species*, <<http://www.iucnredlist.org>> (2017).
- 531 55 Birdlife International and Handbook of the Birds of the World. Bird species distribution maps  
532 of the world. Version 2018.1. . (2018).
- 533 56 Mogg, S., Fastre, C., Jung, M. & Visconti, P. Targeted expansion of Protected Areas to  
534 maximise the persistence of terrestrial mammals. *bioRxiv*, 608992, doi:10.1101/608992  
535 (2019).
- 536 57 Venter, O. *et al.* Global terrestrial Human Footprint maps for 1993 and 2009. *Scientific Data*  
537 **3**, 160067, doi:10.1038/sdata.2016.67 (2016).
- 538 58 Jantke, K. *et al.* Poor ecological representation by an expensive reserve system: Evaluating  
539 35 years of marine protected area expansion. *Conservation Letters* **11**, e12584,  
540 doi:10.1111/conl.12584 (2018).
- 541 59 Beyer, H. L., Dujardin, Y., Watts, M. E. & Possingham, H. P. Solving conservation planning  
542 problems with integer linear programming. *Ecological Modelling* **328**, 14-22,  
543 doi:<https://doi.org/10.1016/j.ecolmodel.2016.02.005> (2016).
- 544 60 Di Marco, M., Watson, J. E. M., Possingham, H. P. & Venter, O. Limitations and trade-offs in  
545 the use of species distribution maps for protected area planning. *Journal of Applied Ecology*  
546 **54**, 402-411, doi:10.1111/1365-2664.12771 (2017).

547

548

549 **Acknowledgements**

550 We thank Peadar Brehony for thoughtful comments on the manuscript.

551

552 **Author Contributions**

553 J.R.A and J.E.M.W. framed the study. J.R.A., S.C.A., M.D.M. carried out the  
554 analyses. All authors discussed and interpreted the results. J.R.A and J.E.M.W.  
555 wrote the manuscript with support from all authors.

556

557 **Competing interests**

558 The authors declare no competing interests
